# Supplementary material
Source: publisher figshare collection journal article supplement (https://acs.figshare.com/ndownloader/files/4440166)
Supplement: Supplementary file 1 [file 4440166]

data_1 
 
_audit_creation_method            SHELXL-97 
_chemical_name_systematic 
; 
 ? 
; 
_chemical_name_common             ? 
_chemical_melting_point           ? 
_chemical_formula_moiety          'C31 H65 Cu4 N4 Na O27 S4'
_chemical_formula_sum 
 'C31 H65 Cu4 N4 Na O27 S4' 
_chemical_formula_weight          1331.26 
 
loop_ 
 _atom_type_symbol 
 _atom_type_description 
 _atom_type_scat_dispersion_real 
 _atom_type_scat_dispersion_imag 
 _atom_type_scat_source 
 'C'  'C'   0.0033   0.0016 
 'International Tables Vol C Tables 4.2.6.8 and 6.1.1.4' 
 'H'  'H'   0.0000   0.0000 
 'International Tables Vol C Tables 4.2.6.8 and 6.1.1.4' 
 'N'  'N'   0.0061   0.0033 
 'International Tables Vol C Tables 4.2.6.8 and 6.1.1.4' 
 'O'  'O'   0.0106   0.0060 
 'International Tables Vol C Tables 4.2.6.8 and 6.1.1.4' 
 'Na'  'Na'   0.0362   0.0249 
 'International Tables Vol C Tables 4.2.6.8 and 6.1.1.4' 
 'S'  'S'   0.1246   0.1234 
 'International Tables Vol C Tables 4.2.6.8 and 6.1.1.4' 
 'Cu'  'Cu'   0.3201   1.2651 
 'International Tables Vol C Tables 4.2.6.8 and 6.1.1.4' 
 
_symmetry_cell_setting            monoclinic
_symmetry_space_group_name_H-M    'P 21/c'
_symmetry_space_group_name_Hall   '-P 2ybc'
 
loop_ 
 _symmetry_equiv_pos_as_xyz 
 'x, y, z' 
 '-x, y+1/2, -z+1/2'
 '-x, -y, -z' 
 'x, -y-1/2, z-1/2' 
 
_cell_length_a                    17.502(3) 
_cell_length_b                    21.080(3) 
_cell_length_c                    13.7686(9) 
_cell_angle_alpha                 90.00 
_cell_angle_beta                  106.664(7) 
_cell_angle_gamma                 90.00 
_cell_volume                      4866.5(11) 
_cell_formula_units_Z             4 
_cell_measurement_temperature     120(2) 
_cell_measurement_reflns_used     19597
_cell_measurement_theta_min       1.00
_cell_measurement_theta_max       27.48
 
_exptl_crystal_description        block
_exptl_crystal_colour             turquoise
_exptl_crystal_size_max           0.25 
_exptl_crystal_size_mid           0.23 
_exptl_crystal_size_min           0.09 
_exptl_crystal_density_meas       ? 
_exptl_crystal_density_diffrn     1.817 
_exptl_crystal_density_method     'not measured' 
_exptl_crystal_F_000              2744 
_exptl_absorpt_coefficient_mu     1.999 
_exptl_absorpt_correction_type    'multi-scan'
_exptl_absorpt_correction_T_min   0.6391
_exptl_absorpt_correction_T_max   0.8406
_exptl_absorpt_process_details    'SADABS v.2.10 (Sheldrick, 2003)'

_publ_section_exptl_refinement
;
The H~2~O and OH hydrogen atoms were located from the difference Fourier map
but constrained to ride on their parent atom, with U~iso~ = 1.5
U~eq~(parent atom).
Other hydrogen atoms  were positioned geometrically and were also constrained
to ride on their parent atoms, with C---H = 0.95-0.99 \%A, and
U~iso~ = 1.2-1.5 U~eq~(parent atom).
The highest peak is located 0.94 \%A from atom O25 and the deepest hole is
located 0.34 \%A from atom H19O.
;
 
_exptl_special_details
; 
 ? 
; 
 
_diffrn_ambient_temperature       120(2) 
_diffrn_radiation_wavelength      0.71073
_diffrn_radiation_type            MoK\a 
_diffrn_radiation_source          'fine-focus sealed tube' 
_diffrn_radiation_monochromator   'horizontally mounted graphite crystal'
_diffrn_measurement_device_type   'Nonius KappaCCD'
_diffrn_measurement_device        '95mm CCD camera on \k-goniostat'
_diffrn_detector_area_resol_mean   9
_diffrn_measurement_method        '\f scans and \w scans with \k offset'
_diffrn_standards_number          ? 
_diffrn_standards_interval_count  ? 
_diffrn_standards_interval_time   ? 
_diffrn_standards_decay_%         ? 
_diffrn_reflns_number             85491 
_diffrn_reflns_av_R_equivalents   0.0565 
_diffrn_reflns_av_sigmaI/netI     0.0409 
_diffrn_reflns_limit_h_min        -22 
_diffrn_reflns_limit_h_max        22 
_diffrn_reflns_limit_k_min        -27 
_diffrn_reflns_limit_k_max        27 
_diffrn_reflns_limit_l_min        -17 
_diffrn_reflns_limit_l_max        17 
_diffrn_reflns_theta_min          1.93 
_diffrn_reflns_theta_max          27.50 
_reflns_number_total              11162 
_reflns_number_gt                 8082 
_reflns_threshold_expression      >2sigma(I) 
 
_computing_data_collection        'Collect (Bruker AXS BV, 1997-2004)'
_computing_cell_refinement        'EvalCCD (Duisenberg, 1998-2003)'
_computing_data_reduction         'EvalCCD (Duisenberg, 1998-2003)'
_computing_structure_solution     'SIR2004 (Burla et al., 2003)'
_computing_structure_refinement   'SHELXL-97 (Sheldrick, 1997)'
_computing_molecular_graphics     'Diamond v.3.1d (Brandenburg, 2006)'
_computing_publication_material   'SHELXL-97 (Sheldrick, 1997)'
 
_refine_special_details 
; 
 Refinement of F^2^ against ALL reflections.  The weighted R-factor wR and 
 goodness of fit S are based on F^2^, conventional R-factors R are based 
 on F, with F set to zero for negative F^2^. The threshold expression of 
 F^2^ > 2sigma(F^2^) is used only for calculating R-factors(gt) etc. and is 
 not relevant to the choice of reflections for refinement.  R-factors based 
 on F^2^ are statistically about twice as large as those based on F, and R- 
 factors based on ALL data will be even larger. 
; 
 
_refine_ls_structure_factor_coef  Fsqd  
_refine_ls_matrix_type            full 
_refine_ls_weighting_scheme       calc  
_refine_ls_weighting_details 
 'calc w=1/[\s^2^(Fo^2^)+(0.0202P)^2^+7.5796P] where P=(Fo^2^+2Fc^2^)/3' 
_atom_sites_solution_primary      direct 
_atom_sites_solution_secondary    difmap 
_atom_sites_solution_hydrogens    geom 
_refine_ls_hydrogen_treatment     constr
_refine_ls_extinction_method      none 
_refine_ls_extinction_coef        ? 
_refine_ls_number_reflns          11162 
_refine_ls_number_parameters      644 
_refine_ls_number_restraints      0 
_refine_ls_R_factor_all           0.0660 
_refine_ls_R_factor_gt            0.0351 
_refine_ls_wR_factor_ref          0.0714 
_refine_ls_wR_factor_gt           0.0628 
_refine_ls_goodness_of_fit_ref    1.061 
_refine_ls_restrained_S_all       1.061 
_refine_ls_shift/su_max           0.000 
_refine_ls_shift/su_mean          0.000 
 
loop_ 
 _atom_site_label 
 _atom_site_type_symbol 
 _atom_site_fract_x 
 _atom_site_fract_y 
 _atom_site_fract_z 
 _atom_site_U_iso_or_equiv 
 _atom_site_adp_type 
 _atom_site_occupancy 
 _atom_site_symmetry_multiplicity 
 _atom_site_calc_flag 
 _atom_site_refinement_flags 
 _atom_site_disorder_assembly 
 _atom_site_disorder_group 
Cu1 Cu 0.200999(18) 0.106321(15) 0.06755(2) 0.01000(7) Uani 1 1 d . . . 
Cu2 Cu 0.286762(18) 0.104462(15) -0.09704(2) 0.01014(7) Uani 1 1 d . . . 
Cu3 Cu 0.400488(18) 0.115916(15) 0.13909(2) 0.01038(7) Uani 1 1 d . . . 
Cu4 Cu 0.088319(18) 0.113312(15) -0.17263(2) 0.01000(7) Uani 1 1 d . . . 
S1 S 0.53374(4) 0.18440(3) 0.07186(5) 0.01408(14) Uani 1 1 d . . . 
S2 S -0.04257(4) 0.18192(3) -0.10484(5) 0.01330(14) Uani 1 1 d . . . 
S3 S 0.13419(4) -0.10341(3) -0.32987(5) 0.01601(15) Uani 1 1 d . . . 
S4 S 0.35907(4) -0.07971(3) 0.34473(5) 0.01453(14) Uani 1 1 d . . . 
Na1 Na 0.22349(7) -0.26067(6) -0.40938(9) 0.0299(3) Uani 1 1 d . . . 
O1 O 0.18608(11) 0.19286(8) 0.00297(14) 0.0138(4) Uani 1 1 d . . . 
O2 O 0.30271(11) 0.19129(8) -0.03410(14) 0.0136(4) Uani 1 1 d . . . 
O3 O 0.25004(14) 0.48898(9) -0.01918(16) 0.0264(5) Uani 1 1 d . . . 
H3O H 0.2995 0.5001 -0.0335 0.040 Uiso 1 1 d R . . 
O4 O 0.38439(11) 0.13805(9) -0.16745(15) 0.0177(4) Uani 1 1 d . . . 
H4O H 0.4243 0.1550 -0.1178 0.027 Uiso 1 1 d R . . 
O5 O 0.34695(10) 0.06305(8) 0.02639(13) 0.0115(4) Uani 1 1 d . . . 
O6 O 0.29942(10) 0.13146(8) 0.16307(13) 0.0114(4) Uani 1 1 d . . . 
O7 O 0.47260(11) 0.03808(9) 0.24684(14) 0.0164(4) Uani 1 1 d . . . 
H7O H 0.4523 0.0017 0.2696 0.025 Uiso 1 1 d R . . 
O8 O 0.49635(11) 0.12395(9) 0.08817(14) 0.0161(4) Uani 1 1 d . . . 
O9 O 0.61951(12) 0.17709(10) 0.09847(16) 0.0235(5) Uani 1 1 d . . . 
O10 O 0.49953(13) 0.20921(10) -0.02975(15) 0.0271(5) Uani 1 1 d . . . 
O11 O 0.14382(10) 0.06389(8) -0.05622(13) 0.0108(4) Uani 1 1 d . . . 
O12 O 0.10762(11) 0.14013(9) 0.14180(14) 0.0151(4) Uani 1 1 d . . . 
H12O H 0.0750 0.1667 0.0984 0.042(11) Uiso 1 1 d R . . 
O13 O 0.37733(12) -0.02915(9) 0.42110(15) 0.0225(5) Uani 1 1 d . . . 
O14 O 0.41370(12) -0.07939(10) 0.28215(15) 0.0214(5) Uani 1 1 d . . . 
O15 O 0.35314(12) -0.14211(9) 0.38779(15) 0.0202(4) Uani 1 1 d . . . 
O16 O 0.19001(11) 0.12947(9) -0.19501(13) 0.0127(4) Uani 1 1 d . . . 
O17 O -0.00788(11) 0.12015(8) -0.12289(14) 0.0149(4) Uani 1 1 d . . . 
O18 O -0.00801(13) 0.20486(10) -0.00272(15) 0.0241(5) Uani 1 1 d . . . 
O19 O 0.01977(11) 0.03357(9) -0.28085(13) 0.0159(4) Uani 1 1 d . . . 
H19O H 0.0418 0.0011 -0.3073 0.024 Uiso 1 1 d R . . 
O20 O 0.11372(13) -0.12441(10) -0.23991(15) 0.0252(5) Uani 1 1 d . . . 
O21 O 0.07982(12) -0.05422(10) -0.38420(15) 0.0233(5) Uani 1 1 d . . . 
O22 O 0.14397(12) -0.15498(9) -0.39584(15) 0.0231(5) Uani 1 1 d . . . 
O23 O 0.27232(13) -0.25528(11) -0.23030(17) 0.0324(6) Uani 1 1 d . . . 
H23O H 0.3042 -0.2232 -0.1938 0.049 Uiso 1 1 d R . . 
H23P H 0.2897 -0.2916 -0.1837 0.049 Uiso 1 1 d R . . 
O24 O 0.29591(14) -0.16911(11) -0.43991(17) 0.0348(6) Uani 1 1 d . . . 
H24O H 0.3104 -0.1579 -0.4986 0.052 Uiso 1 1 d R . . 
H24P H 0.2439 -0.1476 -0.4462 0.052 Uiso 1 1 d R . . 
O25 O 0.12852(11) -0.32199(10) -0.36398(16) 0.0228(5) Uani 1 1 d . . . 
O26 O 0.18734(14) -0.28474(12) -0.58431(18) 0.0408(6) Uani 1 1 d . . . 
H26O H 0.1683 -0.3176 -0.6273 0.061 Uiso 1 1 d R . . 
H26P H 0.2209 -0.2655 -0.6153 0.061 Uiso 1 1 d R . . 
O27 O 0.32619(16) -0.34176(13) -0.4044(2) 0.0505(8) Uani 1 1 d . . . 
H27O H 0.3734 -0.3571 -0.3602 0.076 Uiso 1 1 d R . . 
H27P H 0.3409 -0.3312 -0.4613 0.076 Uiso 1 1 d R . . 
N1 N 0.18748(13) 0.02255(10) 0.14022(16) 0.0109(5) Uani 1 1 d . . . 
N2 N 0.30179(13) 0.02159(10) -0.17055(16) 0.0129(5) Uani 1 1 d . . . 
N3 N 0.44726(13) 0.17117(11) 0.26236(16) 0.0129(5) Uani 1 1 d . . . 
N4 N 0.04188(13) 0.16770(11) -0.29711(17) 0.0146(5) Uani 1 1 d . . . 
C1 C 0.24459(16) 0.22010(12) -0.0159(2) 0.0120(5) Uani 1 1 d . . . 
C2 C 0.24626(16) 0.29107(12) -0.01609(19) 0.0116(5) Uani 1 1 d . . . 
C3 C 0.17647(17) 0.32686(13) -0.0317(2) 0.0160(6) Uani 1 1 d . . . 
H3 H 0.1270 0.3057 -0.0404 0.019 Uiso 1 1 calc R . . 
C4 C 0.17806(18) 0.39233(14) -0.0348(2) 0.0191(6) Uani 1 1 d . . . 
H4 H 0.1297 0.4157 -0.0485 0.023 Uiso 1 1 calc R . . 
C5 C 0.25063(19) 0.42410(13) -0.0176(2) 0.0195(6) Uani 1 1 d . . . 
C6 C 0.32122(18) 0.38955(14) 0.0012(2) 0.0189(6) Uani 1 1 d . . . 
H6 H 0.3710 0.4109 0.0157 0.023 Uiso 1 1 calc R . . 
C7 C 0.31819(17) 0.32353(13) -0.0012(2) 0.0163(6) Uani 1 1 d . . . 
H7 H 0.3661 0.3001 0.0074 0.020 Uiso 1 1 calc R . . 
C8 C 0.30230(16) 0.17311(14) 0.2445(2) 0.0173(6) Uani 1 1 d . . . 
H8A H 0.3006 0.1484 0.3050 0.021 Uiso 1 1 calc R . . 
H8B H 0.2555 0.2018 0.2261 0.021 Uiso 1 1 calc R . . 
C9 C 0.37846(16) 0.21185(14) 0.2683(2) 0.0186(6) Uani 1 1 d . . . 
H9A H 0.3718 0.2473 0.2195 0.022 Uiso 1 1 calc R . . 
H9B H 0.3895 0.2301 0.3373 0.022 Uiso 1 1 calc R . . 
C10 C 0.51673(17) 0.07151(14) 0.3359(2) 0.0202(6) Uani 1 1 d . . . 
H10A H 0.5686 0.0855 0.3278 0.024 Uiso 1 1 calc R . . 
H10B H 0.5275 0.0429 0.3953 0.024 Uiso 1 1 calc R . . 
C11 C 0.47043(18) 0.12827(14) 0.3535(2) 0.0193(6) Uani 1 1 d . . . 
H11A H 0.5032 0.1524 0.4125 0.023 Uiso 1 1 calc R . . 
H11B H 0.4217 0.1138 0.3697 0.023 Uiso 1 1 calc R . . 
C12 C 0.51715(17) 0.21150(14) 0.2607(2) 0.0193(6) Uani 1 1 d . . . 
H12A H 0.5663 0.1856 0.2823 0.023 Uiso 1 1 calc R . . 
H12B H 0.5222 0.2465 0.3102 0.023 Uiso 1 1 calc R . . 
C13 C 0.51014(18) 0.23947(13) 0.1569(2) 0.0185(6) Uani 1 1 d . . . 
H13A H 0.5464 0.2764 0.1649 0.022 Uiso 1 1 calc R . . 
H13B H 0.4550 0.2549 0.1270 0.022 Uiso 1 1 calc R . . 
C14 C 0.39130(17) 0.01071(13) 0.0056(2) 0.0187(6) Uani 1 1 d . . . 
H14A H 0.4045 -0.0189 0.0639 0.022 Uiso 1 1 calc R . . 
H14B H 0.4419 0.0260 -0.0048 0.022 Uiso 1 1 calc R . . 
C15 C 0.34268(17) -0.02348(13) -0.0886(2) 0.0185(6) Uani 1 1 d . . . 
H15A H 0.3782 -0.0516 -0.1137 0.022 Uiso 1 1 calc R . . 
H15B H 0.3022 -0.0504 -0.0710 0.022 Uiso 1 1 calc R . . 
C16 C 0.41763(18) 0.08233(14) -0.1980(2) 0.0215(7) Uani 1 1 d . . . 
H16A H 0.4568 0.0627 -0.1391 0.026 Uiso 1 1 calc R . . 
H16B H 0.4450 0.0930 -0.2496 0.026 Uiso 1 1 calc R . . 
C17 C 0.34909(18) 0.03715(14) -0.2417(2) 0.0209(7) Uani 1 1 d . . . 
H17A H 0.3132 0.0562 -0.3038 0.025 Uiso 1 1 calc R . . 
H17B H 0.3706 -0.0027 -0.2616 0.025 Uiso 1 1 calc R . . 
C18 C 0.22384(16) -0.00537(13) -0.2294(2) 0.0147(6) Uani 1 1 d . . . 
H18A H 0.1951 0.0268 -0.2788 0.018 Uiso 1 1 calc R . . 
H18B H 0.1916 -0.0138 -0.1822 0.018 Uiso 1 1 calc R . . 
C19 C 0.22927(16) -0.06657(13) -0.2866(2) 0.0168(6) Uani 1 1 d . . . 
H19A H 0.2674 -0.0960 -0.2413 0.020 Uiso 1 1 calc R . . 
H19B H 0.2494 -0.0568 -0.3452 0.020 Uiso 1 1 calc R . . 
C20 C 0.18614(17) 0.16560(14) -0.2822(2) 0.0175(6) Uani 1 1 d . . . 
H20A H 0.1849 0.1371 -0.3398 0.021 Uiso 1 1 calc R . . 
H20B H 0.2339 0.1930 -0.2700 0.021 Uiso 1 1 calc R . . 
C21 C 0.11180(17) 0.20604(14) -0.3072(2) 0.0193(6) Uani 1 1 d . . . 
H21A H 0.1203 0.2429 -0.2607 0.023 Uiso 1 1 calc R . . 
H21B H 0.1005 0.2223 -0.3774 0.023 Uiso 1 1 calc R . . 
C22 C -0.03074(17) 0.06894(14) -0.3638(2) 0.0198(6) Uani 1 1 d . . . 
H22A H -0.0787 0.0836 -0.3458 0.024 Uiso 1 1 calc R . . 
H22B H -0.0484 0.0413 -0.4242 0.024 Uiso 1 1 calc R . . 
C23 C 0.01312(18) 0.12509(14) -0.3880(2) 0.0209(6) Uani 1 1 d . . . 
H23A H -0.0226 0.1493 -0.4447 0.025 Uiso 1 1 calc R . . 
H23B H 0.0593 0.1103 -0.4099 0.025 Uiso 1 1 calc R . . 
C24 C -0.02393(18) 0.21073(14) -0.2919(2) 0.0219(7) Uani 1 1 d . . . 
H24A H -0.0751 0.1873 -0.3141 0.026 Uiso 1 1 calc R . . 
H24B H -0.0268 0.2465 -0.3394 0.026 Uiso 1 1 calc R . . 
C25 C -0.01352(19) 0.23691(14) -0.1861(2) 0.0217(7) Uani 1 1 d . . . 
H25A H -0.0458 0.2760 -0.1912 0.026 Uiso 1 1 calc R . . 
H25B H 0.0431 0.2485 -0.1557 0.026 Uiso 1 1 calc R . . 
C26 C 0.06654(16) 0.08318(13) 0.1540(2) 0.0163(6) Uani 1 1 d . . . 
H26A H 0.0316 0.0689 0.0876 0.020 Uiso 1 1 calc R . . 
H26B H 0.0330 0.0910 0.1997 0.020 Uiso 1 1 calc R . . 
C27 C 0.12843(17) 0.03300(13) 0.1987(2) 0.0172(6) Uani 1 1 d . . . 
H27A H 0.1576 0.0454 0.2689 0.021 Uiso 1 1 calc R . . 
H27B H 0.1008 -0.0076 0.2022 0.021 Uiso 1 1 calc R . . 
C28 C 0.10674(16) 0.00686(12) -0.0380(2) 0.0134(6) Uani 1 1 d . . . 
H28A H 0.0987 -0.0220 -0.0968 0.016 Uiso 1 1 calc R . . 
H28B H 0.0540 0.0165 -0.0285 0.016 Uiso 1 1 calc R . . 
C29 C 0.15945(16) -0.02435(12) 0.05587(19) 0.0133(6) Uani 1 1 d . . . 
H29A H 0.1295 -0.0587 0.0777 0.016 Uiso 1 1 calc R . . 
H29B H 0.2061 -0.0436 0.0402 0.016 Uiso 1 1 calc R . . 
C30 C 0.26499(16) 0.00179(12) 0.2095(2) 0.0136(6) Uani 1 1 d . . . 
H30A H 0.2840 0.0346 0.2623 0.016 Uiso 1 1 calc R . . 
H30B H 0.3043 -0.0010 0.1704 0.016 Uiso 1 1 calc R . . 
C31 C 0.26273(16) -0.06223(13) 0.2618(2) 0.0140(6) Uani 1 1 d . . . 
H31A H 0.2463 -0.0961 0.2102 0.017 Uiso 1 1 calc R . . 
H31B H 0.2233 -0.0605 0.3009 0.017 Uiso 1 1 calc R . . 
 
loop_ 
 _atom_site_aniso_label 
 _atom_site_aniso_U_11 
 _atom_site_aniso_U_22 
 _atom_site_aniso_U_33 
 _atom_site_aniso_U_23 
 _atom_site_aniso_U_13 
 _atom_site_aniso_U_12 
Cu1 0.01026(16) 0.00905(16) 0.01050(16) 0.00098(12) 0.00269(13) -0.00101(13) 
Cu2 0.01072(16) 0.00903(16) 0.01067(16) -0.00089(12) 0.00306(13) 0.00114(13) 
Cu3 0.01013(16) 0.01026(17) 0.01086(16) -0.00168(13) 0.00316(13) -0.00039(13) 
Cu4 0.01000(16) 0.01013(16) 0.00985(16) 0.00210(12) 0.00279(13) 0.00143(13) 
S1 0.0141(3) 0.0131(3) 0.0160(3) -0.0004(3) 0.0059(3) -0.0024(3) 
S2 0.0124(3) 0.0122(3) 0.0156(3) -0.0005(3) 0.0044(3) 0.0027(3) 
S3 0.0178(3) 0.0136(3) 0.0150(3) -0.0037(3) 0.0021(3) -0.0007(3) 
S4 0.0169(3) 0.0116(3) 0.0137(3) 0.0021(3) 0.0022(3) 0.0012(3) 
Na1 0.0254(7) 0.0367(8) 0.0279(7) 0.0037(6) 0.0080(6) -0.0114(6) 
O1 0.0154(10) 0.0092(9) 0.0183(10) 0.0032(8) 0.0070(8) 0.0012(8) 
O2 0.0160(10) 0.0086(9) 0.0174(10) -0.0015(7) 0.0069(8) 0.0005(8) 
O3 0.0446(14) 0.0111(10) 0.0309(12) 0.0012(9) 0.0224(11) 0.0014(10) 
O4 0.0173(10) 0.0151(10) 0.0223(11) -0.0038(8) 0.0083(9) -0.0021(8) 
O5 0.0117(9) 0.0097(9) 0.0118(9) -0.0011(7) 0.0015(8) 0.0031(7) 
O6 0.0103(9) 0.0122(9) 0.0113(9) -0.0037(7) 0.0023(8) -0.0009(7) 
O7 0.0183(10) 0.0140(10) 0.0155(10) 0.0007(8) 0.0026(8) -0.0013(8) 
O8 0.0185(10) 0.0129(10) 0.0200(10) -0.0027(8) 0.0103(9) -0.0029(8) 
O9 0.0153(10) 0.0192(11) 0.0367(13) -0.0053(9) 0.0086(10) -0.0023(9) 
O10 0.0338(13) 0.0256(12) 0.0190(11) 0.0059(9) 0.0030(10) -0.0069(10) 
O11 0.0113(9) 0.0098(9) 0.0109(9) 0.0021(7) 0.0024(8) -0.0028(7) 
O12 0.0156(10) 0.0122(10) 0.0184(10) 0.0005(8) 0.0061(9) 0.0000(8) 
O13 0.0256(11) 0.0184(11) 0.0183(11) -0.0027(9) -0.0019(9) 0.0042(9) 
O14 0.0182(11) 0.0198(11) 0.0279(12) 0.0052(9) 0.0092(9) 0.0031(9) 
O15 0.0241(11) 0.0151(10) 0.0204(11) 0.0065(8) 0.0047(9) 0.0036(9) 
O16 0.0123(9) 0.0147(10) 0.0115(9) 0.0040(7) 0.0042(8) 0.0005(8) 
O17 0.0151(10) 0.0111(10) 0.0205(10) 0.0019(8) 0.0084(8) 0.0031(8) 
O18 0.0278(12) 0.0233(11) 0.0181(11) -0.0039(9) 0.0014(9) 0.0085(9) 
O19 0.0178(10) 0.0165(10) 0.0123(10) 0.0001(8) 0.0023(8) 0.0021(8) 
O20 0.0313(12) 0.0223(12) 0.0236(11) -0.0007(9) 0.0103(10) -0.0071(10) 
O21 0.0241(11) 0.0235(11) 0.0176(10) -0.0045(9) -0.0013(9) 0.0068(9) 
O22 0.0235(11) 0.0186(11) 0.0232(11) -0.0114(9) 0.0005(9) -0.0005(9) 
O23 0.0345(14) 0.0265(13) 0.0302(13) -0.0004(10) -0.0004(11) -0.0086(11) 
O24 0.0354(14) 0.0396(14) 0.0333(13) 0.0004(11) 0.0159(11) -0.0055(11) 
O25 0.0137(10) 0.0188(11) 0.0364(13) 0.0003(9) 0.0080(9) -0.0043(9) 
O26 0.0346(14) 0.0492(16) 0.0367(14) -0.0092(12) 0.0075(12) -0.0049(12) 
O27 0.0453(16) 0.0647(19) 0.0515(17) 0.0268(15) 0.0300(14) 0.0198(14) 
N1 0.0098(11) 0.0121(12) 0.0108(11) -0.0003(9) 0.0028(9) -0.0003(9) 
N2 0.0129(12) 0.0123(12) 0.0140(12) -0.0009(9) 0.0045(10) 0.0013(9) 
N3 0.0124(11) 0.0130(12) 0.0124(12) -0.0028(9) 0.0023(10) -0.0013(9) 
N4 0.0141(12) 0.0129(12) 0.0165(12) 0.0026(9) 0.0041(10) 0.0018(9) 
C1 0.0149(13) 0.0125(13) 0.0081(12) 0.0006(11) 0.0023(11) 0.0011(12) 
C2 0.0183(13) 0.0100(12) 0.0082(12) -0.0003(10) 0.0067(11) 0.0003(12) 
C3 0.0192(15) 0.0175(15) 0.0132(14) -0.0001(11) 0.0079(12) 0.0005(12) 
C4 0.0260(16) 0.0173(15) 0.0173(15) 0.0022(12) 0.0113(13) 0.0067(13) 
C5 0.0380(18) 0.0108(13) 0.0139(13) 0.0005(11) 0.0143(13) 0.0019(13) 
C6 0.0248(16) 0.0164(15) 0.0176(15) -0.0005(12) 0.0095(13) -0.0054(13) 
C7 0.0213(15) 0.0148(14) 0.0138(14) 0.0018(11) 0.0068(12) 0.0008(12) 
C8 0.0155(14) 0.0197(15) 0.0178(15) -0.0081(12) 0.0065(12) 0.0033(12) 
C9 0.0140(14) 0.0169(15) 0.0244(16) -0.0079(12) 0.0050(13) -0.0007(12) 
C10 0.0186(15) 0.0202(16) 0.0169(15) -0.0002(12) -0.0025(12) 0.0010(12) 
C11 0.0216(15) 0.0232(16) 0.0121(14) -0.0003(12) 0.0034(12) -0.0006(13) 
C12 0.0165(15) 0.0208(16) 0.0210(16) -0.0070(12) 0.0062(13) -0.0051(12) 
C13 0.0218(16) 0.0110(14) 0.0246(16) -0.0012(12) 0.0095(13) -0.0005(12) 
C14 0.0182(15) 0.0141(15) 0.0204(15) -0.0029(12) 0.0001(12) 0.0080(12) 
C15 0.0217(16) 0.0114(14) 0.0185(15) -0.0031(11) -0.0005(13) 0.0037(12) 
C16 0.0217(16) 0.0192(15) 0.0283(17) -0.0054(13) 0.0146(14) -0.0032(13) 
C17 0.0239(16) 0.0204(16) 0.0238(16) -0.0091(12) 0.0157(14) -0.0036(13) 
C18 0.0146(14) 0.0143(14) 0.0150(14) -0.0042(11) 0.0037(12) -0.0013(11) 
C19 0.0147(14) 0.0182(15) 0.0169(14) -0.0058(12) 0.0033(12) 0.0000(12) 
C20 0.0155(14) 0.0206(15) 0.0163(15) 0.0065(12) 0.0041(12) -0.0006(12) 
C21 0.0197(15) 0.0190(15) 0.0211(15) 0.0096(12) 0.0091(13) 0.0010(12) 
C22 0.0170(15) 0.0240(16) 0.0147(14) 0.0000(12) -0.0013(12) -0.0013(13) 
C23 0.0223(16) 0.0272(17) 0.0122(14) 0.0029(12) 0.0035(12) 0.0006(13) 
C24 0.0204(16) 0.0219(16) 0.0253(16) 0.0099(13) 0.0094(13) 0.0078(13) 
C25 0.0258(16) 0.0123(15) 0.0297(17) 0.0038(12) 0.0123(14) 0.0023(13) 
C26 0.0153(14) 0.0162(14) 0.0201(15) 0.0003(12) 0.0095(12) -0.0013(12) 
C27 0.0193(15) 0.0180(15) 0.0179(15) 0.0036(12) 0.0111(13) 0.0014(12) 
C28 0.0159(14) 0.0104(13) 0.0141(14) 0.0005(11) 0.0049(12) -0.0041(11) 
C29 0.0179(14) 0.0089(13) 0.0123(13) 0.0007(10) 0.0033(11) -0.0012(11) 
C30 0.0134(13) 0.0109(14) 0.0147(14) 0.0030(11) 0.0014(11) 0.0003(11) 
C31 0.0165(14) 0.0129(14) 0.0126(13) 0.0033(11) 0.0041(12) -0.0011(11) 
 
_geom_special_details 
; 
 All esds (except the esd in the dihedral angle between two l.s. planes) 
 are estimated using the full covariance matrix.  The cell esds are taken 
 into account individually in the estimation of esds in distances, angles 
 and torsion angles; correlations between esds in cell parameters are only 
 used when they are defined by crystal symmetry.  An approximate (isotropic) 
 treatment of cell esds is used for estimating esds involving l.s. planes. 
; 
 
loop_ 
 _geom_bond_atom_site_label_1 
 _geom_bond_atom_site_label_2 
 _geom_bond_distance 
 _geom_bond_site_symmetry_2 
 _geom_bond_publ_flag 
Cu1 O6 1.9180(18) . yes
Cu1 O11 1.9307(17) . yes
Cu1 O1 2.0133(18) . yes
Cu1 N1 2.076(2) . yes
Cu1 O12 2.2765(18) . yes
Cu1 Cu2 3.0563(5) . yes
Cu2 O16 1.9118(18) . yes
Cu2 O5 1.9321(17) . yes
Cu2 O2 2.0101(18) . yes
Cu2 N2 2.073(2) . yes
Cu2 O4 2.3045(19) . yes
Cu3 O6 1.9184(18) . yes
Cu3 O5 1.9220(18) . yes
Cu3 O8 2.0025(18) . yes
Cu3 N3 2.027(2) . yes
Cu3 O7 2.3265(19) . yes
Cu4 O16 1.9218(18) . yes
Cu4 O11 1.9249(17) . yes
Cu4 O17 1.9965(18) . yes
Cu4 N4 2.028(2) . yes
Cu4 O19 2.3367(19) . yes
S1 O9 1.448(2) . ?
S1 O10 1.452(2) . ? 
S1 O8 1.4788(19) . ? 
S1 C13 1.779(3) . ? 
S2 O25 1.443(2) 2_554 ? 
S2 O18 1.445(2) . ? 
S2 O17 1.4873(19) . ? 
S2 C25 1.784(3) . ? 
S3 O20 1.454(2) . ? 
S3 O22 1.458(2) . ? 
S3 O21 1.460(2) . ? 
S3 C19 1.777(3) . ? 
S4 O15 1.459(2) . ? 
S4 O14 1.459(2) . ? 
S4 O13 1.467(2) . ? 
S4 C31 1.783(3) . ? 
Na1 O25 2.328(2) . ? 
Na1 O26 2.363(3) . ? 
Na1 O23 2.369(3) . ? 
Na1 O24 2.411(3) . ? 
Na1 O27 2.467(3) . ? 
Na1 O22 2.662(2) . ? 
Na1 H24P 2.4846 . ? 
O1 C1 1.265(3) . ? 
O2 C1 1.270(3) . ? 
O3 C5 1.368(3) . ? 
O3 H3O 0.9698 . ? 
O4 C16 1.427(3) . ? 
O4 H4O 0.9003 . ? 
O5 C14 1.425(3) . ? 
O6 C8 1.413(3) . ? 
O7 C10 1.433(3) . ? 
O7 H7O 0.9373 . ? 
O11 C28 1.422(3) . ? 
O12 C26 1.434(3) . ? 
O12 H12O 0.8957 . ? 
O16 C20 1.406(3) . ? 
O19 C22 1.436(3) . ? 
O19 H19O 0.9114 . ? 
O23 H23O 0.9283 . ? 
O23 H23P 0.9892 . ? 
O24 H24O 0.9444 . ? 
O24 H24P 0.9989 . ? 
O25 S2 1.443(2) 2_544 ? 
O26 H26O 0.9102 . ? 
O26 H26P 0.9142 . ? 
O27 H27O 0.9319 . ? 
O27 H27P 0.9184 . ? 
N1 C30 1.483(3) . ? 
N1 C29 1.497(3) . ? 
N1 C27 1.497(3) . ? 
N2 C18 1.485(3) . ? 
N2 C17 1.490(3) . ? 
N2 C15 1.492(3) . ? 
N3 C12 1.495(3) . ? 
N3 C9 1.500(3) . ? 
N3 C11 1.505(3) . ? 
N4 C24 1.484(4) . ? 
N4 C23 1.505(4) . ? 
N4 C21 1.506(3) . ? 
C1 C2 1.496(4) . ? 
C2 C7 1.395(4) . ? 
C2 C3 1.399(4) . ? 
C3 C4 1.381(4) . ? 
C3 H3 0.9500 . ? 
C4 C5 1.395(4) . ? 
C4 H4 0.9500 . ? 
C5 C6 1.393(4) . ? 
C6 C7 1.393(4) . ? 
C6 H6 0.9500 . ? 
C7 H7 0.9500 . ? 
C8 C9 1.517(4) . ? 
C8 H8A 0.9900 . ? 
C8 H8B 0.9900 . ? 
C9 H9A 0.9900 . ? 
C9 H9B 0.9900 . ? 
C10 C11 1.503(4) . ? 
C10 H10A 0.9900 . ? 
C10 H10B 0.9900 . ? 
C11 H11A 0.9900 . ? 
C11 H11B 0.9900 . ? 
C12 C13 1.519(4) . ? 
C12 H12A 0.9900 . ? 
C12 H12B 0.9900 . ? 
C13 H13A 0.9900 . ? 
C13 H13B 0.9900 . ? 
C14 C15 1.514(4) . ? 
C14 H14A 0.9900 . ? 
C14 H14B 0.9900 . ? 
C15 H15A 0.9900 . ? 
C15 H15B 0.9900 . ? 
C16 C17 1.515(4) . ? 
C16 H16A 0.9900 . ? 
C16 H16B 0.9900 . ? 
C17 H17A 0.9900 . ? 
C17 H17B 0.9900 . ? 
C18 C19 1.529(4) . ? 
C18 H18A 0.9900 . ? 
C18 H18B 0.9900 . ? 
C19 H19A 0.9900 . ? 
C19 H19B 0.9900 . ? 
C20 C21 1.510(4) . ? 
C20 H20A 0.9900 . ? 
C20 H20B 0.9900 . ? 
C21 H21A 0.9900 . ? 
C21 H21B 0.9900 . ? 
C22 C23 1.500(4) . ? 
C22 H22A 0.9900 . ? 
C22 H22B 0.9900 . ? 
C23 H23A 0.9900 . ? 
C23 H23B 0.9900 . ? 
C24 C25 1.519(4) . ? 
C24 H24A 0.9900 . ? 
C24 H24B 0.9900 . ? 
C25 H25A 0.9900 . ? 
C25 H25B 0.9900 . ? 
C26 C27 1.513(4) . ? 
C26 H26A 0.9900 . ? 
C26 H26B 0.9900 . ? 
C27 H27A 0.9900 . ? 
C27 H27B 0.9900 . ? 
C28 C29 1.507(4) . ? 
C28 H28A 0.9900 . ? 
C28 H28B 0.9900 . ? 
C29 H29A 0.9900 . ? 
C29 H29B 0.9900 . ? 
C30 C31 1.536(4) . ? 
C30 H30A 0.9900 . ? 
C30 H30B 0.9900 . ? 
C31 H31A 0.9900 . ? 
C31 H31B 0.9900 . ? 
 
loop_ 
 _geom_angle_atom_site_label_1 
 _geom_angle_atom_site_label_2 
 _geom_angle_atom_site_label_3 
 _geom_angle 
 _geom_angle_site_symmetry_1 
 _geom_angle_site_symmetry_3 
 _geom_angle_publ_flag 
O6 Cu1 O11 150.41(7) . . ? 
O6 Cu1 O1 91.70(8) . . ? 
O11 Cu1 O1 93.51(7) . . ? 
O6 Cu1 N1 96.24(8) . . ? 
O11 Cu1 N1 85.95(8) . . ? 
O1 Cu1 N1 164.83(8) . . ? 
O6 Cu1 O12 102.99(7) . . ? 
O11 Cu1 O12 106.51(7) . . ? 
O1 Cu1 O12 84.02(7) . . ? 
N1 Cu1 O12 81.61(8) . . ? 
O6 Cu1 Cu2 88.65(5) . . ? 
O11 Cu1 Cu2 65.17(5) . . ? 
O1 Cu1 Cu2 73.34(5) . . ? 
N1 Cu1 Cu2 119.63(6) . . ? 
O12 Cu1 Cu2 154.89(5) . . ? 
O16 Cu2 O5 153.44(8) . . ? 
O16 Cu2 O2 92.20(8) . . ? 
O5 Cu2 O2 93.38(7) . . ? 
O16 Cu2 N2 95.66(8) . . ? 
O5 Cu2 N2 86.28(8) . . ? 
O2 Cu2 N2 163.02(8) . . ? 
O16 Cu2 O4 103.42(7) . . ? 
O5 Cu2 O4 103.05(7) . . ? 
O2 Cu2 O4 82.74(7) . . ? 
N2 Cu2 O4 80.81(8) . . ? 
O16 Cu2 Cu1 89.75(5) . . ? 
O5 Cu2 Cu1 67.26(5) . . ? 
O2 Cu2 Cu1 72.88(5) . . ? 
N2 Cu2 Cu1 122.06(6) . . ? 
O4 Cu2 Cu1 152.75(5) . . ? 
O6 Cu3 O5 88.74(7) . . ? 
O6 Cu3 O8 162.23(8) . . ? 
O5 Cu3 O8 91.70(8) . . ? 
O6 Cu3 N3 85.91(8) . . ? 
O5 Cu3 N3 174.46(8) . . ? 
O8 Cu3 N3 93.83(8) . . ? 
O6 Cu3 O7 111.66(7) . . ? 
O5 Cu3 O7 98.96(7) . . ? 
O8 Cu3 O7 85.82(7) . . ? 
N3 Cu3 O7 81.74(8) . . ? 
O16 Cu4 O11 87.71(7) . . ? 
O16 Cu4 O17 162.38(8) . . ? 
O11 Cu4 O17 91.56(8) . . ? 
O16 Cu4 N4 85.95(8) . . ? 
O11 Cu4 N4 173.65(8) . . ? 
O17 Cu4 N4 94.36(8) . . ? 
O16 Cu4 O19 110.79(7) . . ? 
O11 Cu4 O19 100.71(7) . . ? 
O17 Cu4 O19 86.64(7) . . ? 
N4 Cu4 O19 81.94(8) . . ? 
O9 S1 O10 113.15(13) . . ? 
O9 S1 O8 109.99(12) . . ? 
O10 S1 O8 112.24(12) . . ? 
O9 S1 C13 108.81(13) . . ? 
O10 S1 C13 106.82(13) . . ? 
O8 S1 C13 105.43(12) . . ? 
O25 S2 O18 114.73(13) 2_554 . ? 
O25 S2 O17 109.94(12) 2_554 . ? 
O18 S2 O17 112.24(12) . . ? 
O25 S2 C25 108.10(14) 2_554 . ? 
O18 S2 C25 106.12(14) . . ? 
O17 S2 C25 105.10(12) . . ? 
O20 S3 O22 113.93(13) . . ? 
O20 S3 O21 111.67(13) . . ? 
O22 S3 O21 112.71(12) . . ? 
O20 S3 C19 106.44(13) . . ? 
O22 S3 C19 105.60(12) . . ? 
O21 S3 C19 105.75(13) . . ? 
O15 S4 O14 112.28(12) . . ? 
O15 S4 O13 112.97(12) . . ? 
O14 S4 O13 112.03(12) . . ? 
O15 S4 C31 106.39(12) . . ? 
O14 S4 C31 106.29(12) . . ? 
O13 S4 C31 106.29(12) . . ? 
O25 Na1 O26 98.70(9) . . ? 
O25 Na1 O23 79.60(8) . . ? 
O26 Na1 O23 169.15(11) . . ? 
O25 Na1 O24 160.51(10) . . ? 
O26 Na1 O24 89.70(9) . . ? 
O23 Na1 O24 95.30(9) . . ? 
O25 Na1 O27 100.28(9) . . ? 
O26 Na1 O27 81.91(10) . . ? 
O23 Na1 O27 87.82(10) . . ? 
O24 Na1 O27 98.29(10) . . ? 
O25 Na1 O22 91.03(8) . . ? 
O26 Na1 O22 104.99(9) . . ? 
O23 Na1 O22 85.80(8) . . ? 
O24 Na1 O22 69.74(8) . . ? 
O27 Na1 O22 165.80(10) . . ? 
O25 Na1 H24P 138.0 . . ? 
O26 Na1 H24P 90.6 . . ? 
O23 Na1 H24P 97.8 . . ? 
O24 Na1 H24P 23.5 . . ? 
O27 Na1 H24P 121.6 . . ? 
O22 Na1 H24P 47.1 . . ? 
C1 O1 Cu1 119.48(17) . . ? 
C1 O2 Cu2 120.03(17) . . ? 
C5 O3 H3O 104.0 . . ? 
C16 O4 Cu2 106.57(15) . . ? 
C16 O4 H4O 104.9 . . ? 
Cu2 O4 H4O 108.1 . . ?
C14 O5 Cu3 116.35(15) . . ? 
C14 O5 Cu2 111.35(15) . . ? 
Cu3 O5 Cu2 117.70(9) . . yes
C8 O6 Cu1 122.43(16) . . ?
C8 O6 Cu3 114.69(15) . . ?
Cu1 O6 Cu3 121.73(9) . . yes
C10 O7 Cu3 105.04(15) . . ?
C10 O7 H7O 106.3 . . ?
Cu3 O7 H7O 127.0 . . ?
S1 O8 Cu3 125.29(11) . . ?
C28 O11 Cu4 117.24(15) . . ?
C28 O11 Cu1 112.53(15) . . ?
Cu4 O11 Cu1 119.62(9) . . yes
C26 O12 Cu1 103.84(14) . . ?
C26 O12 H12O 110.9 . . ?
Cu1 O12 H12O 107.4 . . ?
C20 O16 Cu2 124.58(16) . . ?
C20 O16 Cu4 114.37(16) . . ?
Cu2 O16 Cu4 120.77(9) . . yes
S2 O17 Cu4 123.05(11) . . ? 
C22 O19 Cu4 102.71(15) . . ? 
C22 O19 H19O 107.9 . . ? 
Cu4 O19 H19O 126.7 . . ? 
S3 O22 Na1 145.59(12) . . ? 
Na1 O23 H23O 125.5 . . ? 
Na1 O23 H23P 126.2 . . ? 
H23O O23 H23P 100.8 . . ? 
Na1 O24 H24O 129.4 . . ? 
Na1 O24 H24P 82.4 . . ? 
H24O O24 H24P 105.9 . . ? 
S2 O25 Na1 130.68(13) 2_544 . ? 
Na1 O26 H26O 140.1 . . ? 
Na1 O26 H26P 111.1 . . ? 
H26O O26 H26P 101.4 . . ? 
Na1 O27 H27O 139.5 . . ? 
Na1 O27 H27P 100.8 . . ? 
H27O O27 H27P 103.3 . . ? 
C30 N1 C29 109.9(2) . . ? 
C30 N1 C27 110.0(2) . . ? 
C29 N1 C27 113.0(2) . . ? 
C30 N1 Cu1 110.57(15) . . ? 
C29 N1 Cu1 104.19(15) . . ? 
C27 N1 Cu1 109.00(16) . . ? 
C18 N2 C17 108.8(2) . . ? 
C18 N2 C15 109.6(2) . . ? 
C17 N2 C15 113.7(2) . . ? 
C18 N2 Cu2 111.30(16) . . ? 
C17 N2 Cu2 107.94(16) . . ? 
C15 N2 Cu2 105.53(16) . . ? 
C12 N3 C9 110.4(2) . . ? 
C12 N3 C11 109.2(2) . . ? 
C9 N3 C11 109.1(2) . . ? 
C12 N3 Cu3 116.72(16) . . ? 
C9 N3 Cu3 103.68(16) . . ? 
C11 N3 Cu3 107.48(16) . . ? 
C24 N4 C23 109.0(2) . . ? 
C24 N4 C21 109.8(2) . . ? 
C23 N4 C21 109.3(2) . . ? 
C24 N4 Cu4 115.67(17) . . ? 
C23 N4 Cu4 108.83(17) . . ? 
C21 N4 Cu4 104.02(16) . . ? 
O1 C1 O2 124.4(2) . . ? 
O1 C1 C2 118.1(2) . . ? 
O2 C1 C2 117.4(2) . . ? 
C7 C2 C3 118.0(2) . . ? 
C7 C2 C1 120.5(2) . . ? 
C3 C2 C1 121.5(2) . . ? 
C4 C3 C2 121.3(3) . . ? 
C4 C3 H3 119.4 . . ? 
C2 C3 H3 119.4 . . ? 
C3 C4 C5 120.0(3) . . ? 
C3 C4 H4 120.0 . . ? 
C5 C4 H4 120.0 . . ? 
O3 C5 C6 121.9(3) . . ? 
O3 C5 C4 118.4(3) . . ? 
C6 C5 C4 119.8(3) . . ? 
C7 C6 C5 119.5(3) . . ? 
C7 C6 H6 120.2 . . ? 
C5 C6 H6 120.2 . . ? 
C6 C7 C2 121.3(3) . . ? 
C6 C7 H7 119.3 . . ? 
C2 C7 H7 119.3 . . ? 
O6 C8 C9 109.6(2) . . ? 
O6 C8 H8A 109.7 . . ? 
C9 C8 H8A 109.7 . . ? 
O6 C8 H8B 109.7 . . ? 
C9 C8 H8B 109.7 . . ? 
H8A C8 H8B 108.2 . . ? 
N3 C9 C8 110.5(2) . . ? 
N3 C9 H9A 109.6 . . ? 
C8 C9 H9A 109.6 . . ? 
N3 C9 H9B 109.6 . . ? 
C8 C9 H9B 109.6 . . ? 
H9A C9 H9B 108.1 . . ? 
O7 C10 C11 110.3(2) . . ? 
O7 C10 H10A 109.6 . . ? 
C11 C10 H10A 109.6 . . ? 
O7 C10 H10B 109.6 . . ? 
C11 C10 H10B 109.6 . . ? 
H10A C10 H10B 108.1 . . ? 
C10 C11 N3 111.9(2) . . ? 
C10 C11 H11A 109.2 . . ? 
N3 C11 H11A 109.2 . . ? 
C10 C11 H11B 109.2 . . ? 
N3 C11 H11B 109.2 . . ? 
H11A C11 H11B 107.9 . . ? 
N3 C12 C13 112.9(2) . . ? 
N3 C12 H12A 109.0 . . ? 
C13 C12 H12A 109.0 . . ? 
N3 C12 H12B 109.0 . . ? 
C13 C12 H12B 109.0 . . ? 
H12A C12 H12B 107.8 . . ? 
C12 C13 S1 113.2(2) . . ? 
C12 C13 H13A 108.9 . . ? 
S1 C13 H13A 108.9 . . ? 
C12 C13 H13B 108.9 . . ? 
S1 C13 H13B 108.9 . . ? 
H13A C13 H13B 107.7 . . ? 
O5 C14 C15 109.6(2) . . ? 
O5 C14 H14A 109.7 . . ? 
C15 C14 H14A 109.7 . . ? 
O5 C14 H14B 109.7 . . ? 
C15 C14 H14B 109.7 . . ? 
H14A C14 H14B 108.2 . . ? 
N2 C15 C14 112.0(2) . . ? 
N2 C15 H15A 109.2 . . ? 
C14 C15 H15A 109.2 . . ? 
N2 C15 H15B 109.2 . . ? 
C14 C15 H15B 109.2 . . ? 
H15A C15 H15B 107.9 . . ? 
O4 C16 C17 107.0(2) . . ? 
O4 C16 H16A 110.3 . . ? 
C17 C16 H16A 110.3 . . ? 
O4 C16 H16B 110.3 . . ? 
C17 C16 H16B 110.3 . . ? 
H16A C16 H16B 108.6 . . ? 
N2 C17 C16 113.8(2) . . ? 
N2 C17 H17A 108.8 . . ? 
C16 C17 H17A 108.8 . . ? 
N2 C17 H17B 108.8 . . ? 
C16 C17 H17B 108.8 . . ? 
H17A C17 H17B 107.7 . . ? 
N2 C18 C19 114.9(2) . . ? 
N2 C18 H18A 108.5 . . ? 
C19 C18 H18A 108.5 . . ? 
N2 C18 H18B 108.5 . . ? 
C19 C18 H18B 108.5 . . ? 
H18A C18 H18B 107.5 . . ? 
C18 C19 S3 110.55(19) . . ? 
C18 C19 H19A 109.5 . . ? 
S3 C19 H19A 109.5 . . ? 
C18 C19 H19B 109.5 . . ? 
S3 C19 H19B 109.5 . . ? 
H19A C19 H19B 108.1 . . ? 
O16 C20 C21 109.2(2) . . ? 
O16 C20 H20A 109.8 . . ? 
C21 C20 H20A 109.8 . . ? 
O16 C20 H20B 109.8 . . ? 
C21 C20 H20B 109.8 . . ? 
H20A C20 H20B 108.3 . . ? 
N4 C21 C20 110.2(2) . . ? 
N4 C21 H21A 109.6 . . ? 
C20 C21 H21A 109.6 . . ? 
N4 C21 H21B 109.6 . . ? 
C20 C21 H21B 109.6 . . ? 
H21A C21 H21B 108.1 . . ? 
O19 C22 C23 110.4(2) . . ? 
O19 C22 H22A 109.6 . . ? 
C23 C22 H22A 109.6 . . ? 
O19 C22 H22B 109.6 . . ? 
C23 C22 H22B 109.6 . . ? 
H22A C22 H22B 108.1 . . ? 
C22 C23 N4 110.9(2) . . ? 
C22 C23 H23A 109.5 . . ? 
N4 C23 H23A 109.5 . . ? 
C22 C23 H23B 109.5 . . ? 
N4 C23 H23B 109.5 . . ? 
H23A C23 H23B 108.1 . . ? 
N4 C24 C25 112.8(2) . . ? 
N4 C24 H24A 109.0 . . ? 
C25 C24 H24A 109.0 . . ? 
N4 C24 H24B 109.0 . . ? 
C25 C24 H24B 109.0 . . ? 
H24A C24 H24B 107.8 . . ? 
C24 C25 S2 112.8(2) . . ? 
C24 C25 H25A 109.0 . . ? 
S2 C25 H25A 109.0 . . ? 
C24 C25 H25B 109.0 . . ? 
S2 C25 H25B 109.0 . . ? 
H25A C25 H25B 107.8 . . ? 
O12 C26 C27 108.0(2) . . ? 
O12 C26 H26A 110.1 . . ? 
C27 C26 H26A 110.1 . . ? 
O12 C26 H26B 110.1 . . ? 
C27 C26 H26B 110.1 . . ? 
H26A C26 H26B 108.4 . . ? 
N1 C27 C26 114.1(2) . . ? 
N1 C27 H27A 108.7 . . ? 
C26 C27 H27A 108.7 . . ? 
N1 C27 H27B 108.7 . . ? 
C26 C27 H27B 108.7 . . ? 
H27A C27 H27B 107.6 . . ? 
O11 C28 C29 108.8(2) . . ? 
O11 C28 H28A 109.9 . . ? 
C29 C28 H28A 109.9 . . ? 
O11 C28 H28B 109.9 . . ? 
C29 C28 H28B 109.9 . . ? 
H28A C28 H28B 108.3 . . ? 
N1 C29 C28 111.2(2) . . ? 
N1 C29 H29A 109.4 . . ? 
C28 C29 H29A 109.4 . . ? 
N1 C29 H29B 109.4 . . ? 
C28 C29 H29B 109.4 . . ? 
H29A C29 H29B 108.0 . . ? 
N1 C30 C31 114.8(2) . . ? 
N1 C30 H30A 108.6 . . ? 
C31 C30 H30A 108.6 . . ? 
N1 C30 H30B 108.6 . . ? 
C31 C30 H30B 108.6 . . ? 
H30A C30 H30B 107.5 . . ? 
C30 C31 S4 109.58(18) . . ? 
C30 C31 H31A 109.8 . . ? 
S4 C31 H31A 109.8 . . ? 
C30 C31 H31B 109.8 . . ? 
S4 C31 H31B 109.8 . . ? 
H31A C31 H31B 108.2 . . ? 
 
loop_ 
 _geom_hbond_atom_site_label_D 
 _geom_hbond_atom_site_label_H 
 _geom_hbond_atom_site_label_A 
 _geom_hbond_distance_DH 
 _geom_hbond_distance_HA 
 _geom_hbond_distance_DA 
 _geom_hbond_angle_DHA 
 _geom_hbond_site_symmetry_A
 _geom_hbond_publ_flag
O3 H3O O13  0.97 1.76 2.722(3) 168.9 4_565 yes
O4 H4O O10  0.90 1.89 2.778(3) 166.2 . yes
O7 H7O O14  0.94 1.86 2.778(3) 164.7 . yes
O12 H12O O18  0.90 1.88 2.758(3) 166.3 . yes
O19 H19O O21  0.91 1.82 2.722(3) 168.2 . yes
O23 H23O O9  0.93 1.86 2.761(3) 164.6 3_655 yes
O23 H23P O15  0.99 1.88 2.829(3) 160.3 4 yes
O24 H24O O15  0.94 1.95 2.884(3) 172.1 1_554 yes
O24 H24P O22  1.00 2.06 2.908(3) 140.9 . yes
O24 H24P S3  1.00 2.98 3.832(2) 143.9 . yes
O26 H26O O20  0.91 1.99 2.887(3) 168.1 4 yes
O26 H26P O23  0.91 2.08 2.946(3) 157.7 4 yes
O27 H27O O14  0.93 2.31 3.074(3) 138.9 4 yes
O27 H27P O9  0.92 2.20 3.107(3) 170.4 2_644 yes

_diffrn_measured_fraction_theta_max    0.998
_diffrn_reflns_theta_full              27.50
_diffrn_measured_fraction_theta_full   0.998
_refine_diff_density_max    0.649
_refine_diff_density_min   -0.488
_refine_diff_density_rms    0.096

# start Validation Reply Form
_vrf_PUBL220_GLOBAL
;
PROBLEM: Large Non-Solvent    O     Ueq(max)/Ueq(min) ...       4.68 Ratio
RESPONSE: The oxygen atoms with large U~eq~ values belong to water molecules
around atom Na1, which are essentially solvent molecules. The other oxygens
with smaller U~eq~ values are covalently bonded and part of the Cu moiety.
;
_vrf_PUBL222_GLOBAL
;
PROBLEM: Large Non-Solvent    H     Ueq(max)/Ueq(min) ...       4.75 Ratio
RESPONSE: This problem is related to the problem 222.
;
_vrf_PUBL417_GLOBAL
;
PROBLEM:  Short Inter D-H..H-D       H23O   ..  H26P    ..       2.06 Ang.
RESPONSE: The hydrogen atoms were located from the difference Fourier map and
their positions were not idelized.
;
_vrf_PUBL420_GLOBAL
;
PROBLEM:  D-H Without Acceptor       O24    -   H24P   ...          ?
RESPONSE: There are two potential H-bonds listed in the hydrogen bon list for
O24-H24P.
;
# end Validation Reply Form

 
data_2
 
_audit_creation_method            SHELXL-97
_chemical_name_systematic
;
 ?
;
_chemical_name_common             ?
_chemical_melting_point           ?
_chemical_formula_moiety          'C31 H57 Cu4 N4 Na O22 S4'
_chemical_formula_sum
 'C31 H57 Cu4 N4 Na O22 S4'
_chemical_formula_weight          1243.20

 
loop_
 _atom_type_symbol
 _atom_type_description
 _atom_type_scat_dispersion_real
 _atom_type_scat_dispersion_imag
 _atom_type_scat_source
 'C'  'C'   0.0033   0.0016
 'International Tables Vol C Tables 4.2.6.8 and 6.1.1.4'
 'H'  'H'   0.0000   0.0000
 'International Tables Vol C Tables 4.2.6.8 and 6.1.1.4'
 'N'  'N'   0.0061   0.0033
 'International Tables Vol C Tables 4.2.6.8 and 6.1.1.4'
 'O'  'O'   0.0106   0.0060
 'International Tables Vol C Tables 4.2.6.8 and 6.1.1.4'
 'Na'  'Na'   0.0362   0.0249
 'International Tables Vol C Tables 4.2.6.8 and 6.1.1.4'
 'S'  'S'   0.1246   0.1234
 'International Tables Vol C Tables 4.2.6.8 and 6.1.1.4'
 'Cu'  'Cu'   0.3201   1.2651
 'International Tables Vol C Tables 4.2.6.8 and 6.1.1.4'
 
_symmetry_cell_setting            monoclinic
_symmetry_space_group_name_H-M    'C 2/c'
_symmetry_space_group_name_Hall   '-C 2yc' 

 
loop_
 _symmetry_equiv_pos_as_xyz
 'x, y, z'
 '-x, y, -z+1/2'
 'x+1/2, y+1/2, z'
 '-x+1/2, y+1/2, -z+1/2'
 '-x, -y, -z'
 'x, -y, z-1/2'
 '-x+1/2, -y+1/2, -z'
 'x+1/2, -y+1/2, z-1/2'
 
_cell_length_a                    18.0367(13)
_cell_length_b                    21.0944(15)
_cell_length_c                    14.0941(10)
_cell_angle_alpha                 90.00
_cell_angle_beta                  116.122(3)
_cell_angle_gamma                 90.00
_cell_volume                      4814.7(6)
_cell_formula_units_Z             4
_cell_measurement_temperature     292(2)
_cell_measurement_reflns_used    2325
_cell_measurement_theta_min        2.51
_cell_measurement_theta_max       22.89
 
_exptl_crystal_description        prism
_exptl_crystal_colour             blue
_exptl_crystal_size_max           0.32
_exptl_crystal_size_mid           0.28
_exptl_crystal_size_min           0.22
_exptl_crystal_density_meas       ?
_exptl_crystal_density_diffrn     1.715
_exptl_crystal_density_method     'not measured'
_exptl_crystal_F_000              2552
_exptl_absorpt_coefficient_mu     2.006
_exptl_absorpt_correction_type    multi-scan
_exptl_absorpt_correction_T_min   0.5661
_exptl_absorpt_correction_T_max   0.6666
_exptl_absorpt_process_details    sadabs
 
_exptl_special_details
;
 ?
;
 
_diffrn_ambient_temperature       292(2)
_diffrn_radiation_wavelength      0.71069
_diffrn_radiation_type            MoK\a
_diffrn_radiation_source          'fine-focus sealed tube'
_diffrn_radiation_monochromator   graphite
_diffrn_measurement_device_type  'CCD area detector'
_diffrn_measurement_method       'phi and omega scans'
_diffrn_detector_area_resol_mean  ?
_diffrn_standards_number          ?
_diffrn_standards_interval_count  ?
_diffrn_standards_interval_time   ?
_diffrn_standards_decay_%         ?
_diffrn_reflns_number             18403
_diffrn_reflns_av_R_equivalents   0.0780
_diffrn_reflns_av_sigmaI/netI     0.1025
_diffrn_reflns_limit_h_min        -23
_diffrn_reflns_limit_h_max        23
_diffrn_reflns_limit_k_min        -26
_diffrn_reflns_limit_k_max        21
_diffrn_reflns_limit_l_min        -18
_diffrn_reflns_limit_l_max        17
_diffrn_reflns_theta_min          1.93
_diffrn_reflns_theta_max          27.10
_reflns_number_total              5291
_reflns_number_gt                 2934
_reflns_threshold_expression      >2sigma(I)
 
_computing_data_collection      'Bruker SMART'
_computing_cell_refinement      'Bruker SMART'
_computing_data_reduction       'Bruker SAINT'
_computing_structure_solution           'SIR97 (Giacovazzo et al, 1997)'
_computing_structure_refinement         'SHELXL-97 (Sheldrick, 1997)'
_computing_molecular_graphics           'Ortep-3 for Windows (Farrugia, 1997)'
_computing_publication_material
                                   'WinGX publication routines (Farrugia, 1999)'
 
_refine_special_details
;
 Refinement of F^2^ against ALL reflections.  The weighted R-factor wR and
 goodness of fit S are based on F^2^, conventional R-factors R are based
 on F, with F set to zero for negative F^2^. The threshold expression of
 F^2^ > 2sigma(F^2^) is used only for calculating R-factors(gt) etc. and is
 not relevant to the choice of reflections for refinement.  R-factors based
 on F^2^ are statistically about twice as large as those based on F, and R-
 factors based on ALL data will be even larger.
;
 
_refine_ls_structure_factor_coef  Fsqd
_refine_ls_matrix_type            full
_refine_ls_weighting_scheme       calc
_refine_ls_weighting_details
 'calc w=1/[\s^2^(Fo^2^)+(0.0564P)^2^+0.0000P] where P=(Fo^2^+2Fc^2^)/3'
_atom_sites_solution_primary      direct
_atom_sites_solution_secondary    difmap
_atom_sites_solution_hydrogens    geom
_refine_ls_hydrogen_treatment     constr
_refine_ls_extinction_method      none
_refine_ls_extinction_coef        ?
_refine_ls_number_reflns          5291
_refine_ls_number_parameters      301
_refine_ls_number_restraints      0
_refine_ls_R_factor_all           0.1054
_refine_ls_R_factor_gt            0.0518
_refine_ls_wR_factor_ref          0.1250
_refine_ls_wR_factor_gt           0.1083
_refine_ls_goodness_of_fit_ref    0.913
_refine_ls_restrained_S_all       0.913
_refine_ls_shift/su_max           0.002
_refine_ls_shift/su_mean          0.000

loop_
  _platon_squeeze_void_nr
  _platon_squeeze_void_average_x
  _platon_squeeze_void_average_y
  _platon_squeeze_void_average_z
  _platon_squeeze_void_volume
  _platon_squeeze_void_count_electrons
         1     0.500     0.008     0.250     101.9      21.2
         2     1.000     0.508     0.250     101.9      21.2
         3     0.500    -0.008     0.750     102.0      25.5
         4     1.000     0.492     0.750     102.0      25.5
_platon_squeeze_details
;
;
 
loop_
 _atom_site_label
 _atom_site_type_symbol
 _atom_site_fract_x
 _atom_site_fract_y
 _atom_site_fract_z
 _atom_site_U_iso_or_equiv
 _atom_site_adp_type
 _atom_site_occupancy
 _atom_site_symmetry_multiplicity
 _atom_site_calc_flag
 _atom_site_refinement_flags
 _atom_site_disorder_assembly
 _atom_site_disorder_group
C1 C 1.0000 0.0243(3) 0.2500 0.0300(17) Uani 1 2 d S . .
C2 C 1.0000 -0.0473(3) 0.2500 0.0297(17) Uani 1 2 d S . .
C3 C 0.9277(4) -0.0806(2) 0.2000(4) 0.0430(14) Uani 1 1 d . . .
H3 H 0.8781 -0.0588 0.1649 0.052 Uiso 1 1 calc R . .
C4 C 0.9276(5) -0.1462(3) 0.2012(5) 0.061(2) Uani 1 1 d . . .
H4 H 0.8778 -0.1679 0.1684 0.073 Uiso 1 1 calc R . .
C5 C 1.0000 -0.1797(4) 0.2500 0.061(3) Uani 1 2 d S . .
H5 H 1.0000 -0.2238 0.2500 0.074 Uiso 1 2 calc SR . .
C11 C 0.9028(3) 0.2680(2) 0.0951(4) 0.0369(13) Uani 1 1 d . . .
H11A H 0.9476 0.2908 0.1507 0.044 Uiso 1 1 calc R . .
H11B H 0.8683 0.2987 0.0433 0.044 Uiso 1 1 calc R . .
C12 C 0.8530(3) 0.2353(2) 0.1411(4) 0.0347(13) Uani 1 1 d . . .
H12A H 0.8440 0.2636 0.1892 0.042 Uiso 1 1 calc R . .
H12B H 0.7996 0.2236 0.0851 0.042 Uiso 1 1 calc R . .
C13 C 0.8812(3) 0.2102(3) -0.0693(4) 0.0430(14) Uani 1 1 d . . .
H13A H 0.9137 0.1958 -0.1045 0.052 Uiso 1 1 calc R . .
H13B H 0.8550 0.2498 -0.1023 0.052 Uiso 1 1 calc R . .
C14 C 0.8155(4) 0.1625(2) -0.0871(5) 0.0480(15) Uani 1 1 d . . .
H14A H 0.7769 0.1790 -0.0624 0.058 Uiso 1 1 calc R . .
H14B H 0.7853 0.1534 -0.1620 0.058 Uiso 1 1 calc R . .
C15 C 1.0180(3) 0.2487(2) 0.0529(4) 0.0347(13) Uani 1 1 d . . .
H15A H 1.0423 0.2176 0.0242 0.042 Uiso 1 1 calc R . .
H15B H 1.0551 0.2536 0.1273 0.042 Uiso 1 1 calc R . .
C16 C 1.0128(3) 0.3111(2) -0.0017(5) 0.0423(14) Uani 1 1 d . . .
H16A H 0.9733 0.3385 0.0079 0.051 Uiso 1 1 calc R . .
H16B H 0.9934 0.3040 -0.0768 0.051 Uiso 1 1 calc R . .
C21 C 1.1368(3) 0.0419(2) 0.0815(4) 0.0391(14) Uani 1 1 d . . .
H21A H 1.1286 0.0047 0.1163 0.047 Uiso 1 1 calc R . .
H21B H 1.1481 0.0278 0.0237 0.047 Uiso 1 1 calc R . .
C22 C 1.0597(3) 0.0823(2) 0.0390(4) 0.0349(13) Uani 1 1 d . . .
H22A H 1.0612 0.1123 -0.0122 0.042 Uiso 1 1 calc R . .
H22B H 1.0114 0.0556 0.0039 0.042 Uiso 1 1 calc R . .
C23 C 1.2396(3) 0.1231(3) 0.0995(5) 0.0445(15) Uani 1 1 d . . .
H23A H 1.2770 0.0999 0.0795 0.053 Uiso 1 1 calc R . .
H23B H 1.1935 0.1375 0.0353 0.053 Uiso 1 1 calc R . .
C24 C 1.2835(4) 0.1793(3) 0.1646(5) 0.0505(16) Uani 1 1 d . . .
H24A H 1.3326 0.1654 0.2258 0.061 Uiso 1 1 calc R . .
H24B H 1.3008 0.2071 0.1232 0.061 Uiso 1 1 calc R . .
C25 C 1.2759(3) 0.0362(3) 0.2235(4) 0.0411(14) Uani 1 1 d . . .
H25A H 1.3278 0.0589 0.2500 0.049 Uiso 1 1 calc R . .
H25B H 1.2785 0.0016 0.1798 0.049 Uiso 1 1 calc R . .
C26 C 1.2647(3) 0.0094(2) 0.3156(4) 0.0418(14) Uani 1 1 d . . .
H26A H 1.2954 -0.0299 0.3382 0.050 Uiso 1 1 calc R . .
H26B H 1.2068 -0.0002 0.2931 0.050 Uiso 1 1 calc R . .
N1 N 0.9381(2) 0.22313(18) 0.0435(3) 0.0282(9) Uani 1 1 d . . .
N2 N 1.2082(2) 0.07941(18) 0.1582(3) 0.0313(10) Uani 1 1 d . . .
O1 O 0.9406(2) 0.05205(15) 0.1764(3) 0.0339(8) Uani 1 1 d . . .
O12 O 0.89525(19) 0.18014(14) 0.1960(3) 0.0282(8) Uani 1 1 d . . .
O13 O 1.1666(3) 0.3044(2) 0.0407(4) 0.0792(16) Uani 1 1 d . . .
O14 O 0.8530(2) 0.10632(15) -0.0311(3) 0.0370(9) Uani 1 1 d . . .
O15 O 1.1320(3) 0.3601(2) 0.1618(4) 0.0907(17) Uani 1 1 d . . .
O16 O 1.0974(3) 0.40650(18) -0.0097(4) 0.0744(15) Uani 1 1 d . . .
O22 O 1.05473(19) 0.11493(15) 0.1228(3) 0.0279(8) Uani 1 1 d . . .
O23 O 1.2628(2) 0.12456(14) 0.3762(3) 0.0343(9) Uani 1 1 d . . .
O24 O 1.2305(2) 0.21365(17) 0.1990(3) 0.0439(10) Uani 1 1 d . . .
O25 O 1.2670(2) 0.04125(18) 0.4962(3) 0.0531(11) Uani 1 1 d . . .
O26 O 1.3874(2) 0.06565(17) 0.4681(3) 0.0493(11) Uani 1 1 d . . .
S1 S 1.10945(11) 0.34855(7) 0.04938(16) 0.0564(5) Uani 1 1 d . . .
S2 S 1.29880(8) 0.06287(6) 0.42376(11) 0.0344(3) Uani 1 1 d . . .
Cu1 Cu 0.95481(4) 0.13935(3) 0.12824(5) 0.02554(17) Uani 1 1 d . . .
Cu2 Cu 1.16040(4) 0.13207(3) 0.23866(5) 0.02647(17) Uani 1 1 d . . .
Na1 Na 1.5000 0.0000 0.5000 0.0905(15) Uani 1 2 d S . .
H24 H 1.2009 0.2459 0.1365 0.109 Uiso 1 1 d . . .
H14 H 0.8060 0.0790 -0.0423 0.109 Uiso 1 1 d . . .
 
loop_
 _atom_site_aniso_label
 _atom_site_aniso_U_11
 _atom_site_aniso_U_22
 _atom_site_aniso_U_33
 _atom_site_aniso_U_23
 _atom_site_aniso_U_13
 _atom_site_aniso_U_12
C1 0.034(4) 0.030(4) 0.032(4) 0.000 0.020(4) 0.000
C2 0.048(5) 0.018(3) 0.030(4) 0.000 0.022(4) 0.000
C3 0.059(4) 0.035(3) 0.038(3) -0.007(3) 0.025(3) -0.014(3)
C4 0.107(6) 0.035(4) 0.054(4) -0.015(3) 0.047(5) -0.032(4)
C5 0.128(10) 0.023(4) 0.047(6) 0.000 0.051(7) 0.000
C11 0.049(4) 0.023(3) 0.047(3) 0.010(3) 0.029(3) 0.004(2)
C12 0.036(3) 0.025(3) 0.044(3) 0.007(2) 0.019(3) 0.005(2)
C13 0.049(4) 0.042(3) 0.032(3) 0.007(3) 0.012(3) -0.008(3)
C14 0.047(4) 0.037(3) 0.046(4) 0.004(3) 0.007(3) -0.003(3)
C15 0.036(3) 0.025(3) 0.045(3) 0.008(2) 0.019(3) -0.002(2)
C16 0.043(4) 0.034(3) 0.055(4) 0.008(3) 0.025(3) -0.004(3)
C21 0.037(3) 0.034(3) 0.039(3) -0.012(3) 0.010(3) 0.002(2)
C22 0.032(3) 0.031(3) 0.036(3) -0.010(2) 0.010(3) 0.000(2)
C23 0.044(4) 0.051(4) 0.044(3) 0.000(3) 0.025(3) 0.000(3)
C24 0.044(4) 0.052(4) 0.064(4) -0.002(3) 0.031(4) -0.007(3)
C25 0.042(4) 0.042(3) 0.040(3) -0.007(3) 0.019(3) 0.016(3)
C26 0.044(4) 0.024(3) 0.051(4) -0.001(3) 0.015(3) 0.010(2)
N1 0.026(2) 0.024(2) 0.034(2) 0.0034(19) 0.013(2) 0.0008(18)
N2 0.028(2) 0.027(2) 0.040(3) -0.002(2) 0.016(2) 0.0031(19)
O1 0.035(2) 0.0249(18) 0.037(2) 0.0044(17) 0.0112(18) -0.0036(16)
O12 0.0273(19) 0.0221(17) 0.0378(19) 0.0063(16) 0.0166(16) 0.0033(15)
O13 0.067(3) 0.072(3) 0.123(5) 0.037(3) 0.064(3) 0.014(3)
O14 0.033(2) 0.0253(18) 0.045(2) -0.0002(17) 0.0100(19) 0.0004(16)
O15 0.109(4) 0.077(3) 0.070(4) -0.013(3) 0.025(3) -0.036(3)
O16 0.082(4) 0.040(2) 0.109(4) 0.027(3) 0.050(3) -0.012(2)
O22 0.0229(18) 0.0303(18) 0.0293(19) -0.0038(15) 0.0103(16) 0.0011(14)
O23 0.036(2) 0.0241(18) 0.036(2) -0.0003(16) 0.0100(18) 0.0078(16)
O24 0.043(2) 0.040(2) 0.053(3) -0.0031(19) 0.025(2) -0.0050(18)
O25 0.057(3) 0.058(3) 0.056(3) 0.019(2) 0.035(2) 0.016(2)
O26 0.029(2) 0.044(2) 0.066(3) 0.002(2) 0.012(2) 0.0065(18)
S1 0.0573(11) 0.0378(9) 0.0792(13) 0.0105(9) 0.0348(10) -0.0103(8)
S2 0.0281(7) 0.0316(7) 0.0401(8) 0.0032(6) 0.0120(7) 0.0069(6)
Cu1 0.0249(3) 0.0210(3) 0.0308(3) 0.0042(3) 0.0123(3) 0.0019(3)
Cu2 0.0253(3) 0.0247(3) 0.0301(3) -0.0028(3) 0.0128(3) 0.0013(3)
Na1 0.045(2) 0.061(2) 0.140(4) -0.007(3) 0.017(3) 0.021(2)
 
_geom_special_details
;
 All esds (except the esd in the dihedral angle between two l.s. planes)
 are estimated using the full covariance matrix.  The cell esds are taken
 into account individually in the estimation of esds in distances, angles
 and torsion angles; correlations between esds in cell parameters are only
 used when they are defined by crystal symmetry.  An approximate (isotropic)
 treatment of cell esds is used for estimating esds involving l.s. planes.
;
 
loop_
 _geom_bond_atom_site_label_1
 _geom_bond_atom_site_label_2
 _geom_bond_distance
 _geom_bond_site_symmetry_2
 _geom_bond_publ_flag
C1 O1 1.260(4) . ?
C1 O1 1.260(4) 2_755 ?
C1 C2 1.510(9) . ?
C2 C3 1.372(6) . ?
C2 C3 1.372(6) 2_755 ?
C3 C4 1.384(7) . ?
C3 H3 0.9300 . ?
C4 C5 1.375(8) . ?
C4 H4 0.9300 . ?
C5 C4 1.375(8) 2_755 ?
C5 H5 0.9300 . ?
C11 C12 1.489(6) . ?
C11 N1 1.496(6) . ?
C11 H11A 0.9700 . ?
C11 H11B 0.9700 . ?
C12 O12 1.419(5) . ?
C12 H12A 0.9700 . ?
C12 H12B 0.9700 . ?
C13 N1 1.489(6) . ?
C13 C14 1.490(7) . ?
C13 H13A 0.9700 . ?
C13 H13B 0.9700 . ?
C14 O14 1.420(6) . ?
C14 H14A 0.9700 . ?
C14 H14B 0.9700 . ?
C15 N1 1.489(6) . ?
C15 C16 1.508(6) . ?
C15 H15A 0.9700 . ?
C15 H15B 0.9700 . ?
C16 S1 1.754(5) . ?
C16 H16A 0.9700 . ?
C16 H16B 0.9700 . ?
C21 N2 1.492(6) . ?
C21 C22 1.512(7) . ?
C21 H21A 0.9700 . ?
C21 H21B 0.9700 . ?
C22 O22 1.403(6) . ?
C22 H22A 0.9700 . ?
C22 H22B 0.9700 . ?
C23 C24 1.495(7) . ?
C23 N2 1.506(6) . ?
C23 H23A 0.9700 . ?
C23 H23B 0.9700 . ?
C24 O24 1.444(6) . ?
C24 H24A 0.9700 . ?
C24 H24B 0.9700 . ?
C25 N2 1.476(6) . ?
C25 C26 1.508(7) . ?
C25 H25A 0.9700 . ?
C25 H25B 0.9700 . ?
C26 S2 1.775(5) . ?
C26 H26A 0.9700 . ?
C26 H26B 0.9700 . ?
N1 Cu1 2.079(4) . ?
N2 Cu2 2.031(4) . ?
O1 Cu1 2.018(3) . ?
O12 Cu2 1.923(3) 2_755 ?
O12 Cu1 1.926(3) . ?
O13 S1 1.434(4) . ?
O14 Cu1 2.296(3) . ?
O14 H14 0.978 . ?
O15 S1 1.472(5) . ?
O16 S1 1.440(4) . ?
O16 Na1 2.685(4) 4_755 ?
O22 Cu1 1.908(3) . ?
O22 Cu2 1.921(3) . ?
O23 S2 1.477(3) . ?
O23 Cu2 2.010(3) . ?
O24 Cu2 2.344(3) . ?
O24 H24 1.053 . ?
O25 S2 1.446(4) . ?
O26 S2 1.438(4) . ?
O26 Na1 2.333(3) . ?
Cu2 O12 1.923(3) 2_755 ?
Na1 O26 2.333(3) 5_856 ?
Na1 O16 2.685(5) 4_745 ?
Na1 O16 2.685(5) 8_556 ?
 
loop_
 _geom_angle_atom_site_label_1
 _geom_angle_atom_site_label_2
 _geom_angle_atom_site_label_3
 _geom_angle
 _geom_angle_site_symmetry_1
 _geom_angle_site_symmetry_3
 _geom_angle_publ_flag
O1 C1 O1 124.6(6) . 2_755 ?
O1 C1 C2 117.7(3) . . ?
O1 C1 C2 117.7(3) 2_755 . ?
C3 C2 C3 118.4(7) . 2_755 ?
C3 C2 C1 120.8(3) . . ?
C3 C2 C1 120.8(3) 2_755 . ?
C2 C3 C4 120.8(6) . . ?
C2 C3 H3 119.6 . . ?
C4 C3 H3 119.6 . . ?
C5 C4 C3 121.0(7) . . ?
C5 C4 H4 119.5 . . ?
C3 C4 H4 119.5 . . ?
C4 C5 C4 118.0(8) 2_755 . ?
C4 C5 H5 121.0 2_755 . ?
C4 C5 H5 121.0 . . ?
C12 C11 N1 112.7(4) . . ?
C12 C11 H11A 109.1 . . ?
N1 C11 H11A 109.1 . . ?
C12 C11 H11B 109.1 . . ?
N1 C11 H11B 109.1 . . ?
H11A C11 H11B 107.8 . . ?
O12 C12 C11 109.6(4) . . ?
O12 C12 H12A 109.8 . . ?
C11 C12 H12A 109.8 . . ?
O12 C12 H12B 109.8 . . ?
C11 C12 H12B 109.8 . . ?
H12A C12 H12B 108.2 . . ?
N1 C13 C14 115.2(4) . . ?
N1 C13 H13A 108.5 . . ?
C14 C13 H13A 108.5 . . ?
N1 C13 H13B 108.5 . . ?
C14 C13 H13B 108.5 . . ?
H13A C13 H13B 107.5 . . ?
O14 C14 C13 108.8(4) . . ?
O14 C14 H14A 109.9 . . ?
C13 C14 H14A 109.9 . . ?
O14 C14 H14B 109.9 . . ?
C13 C14 H14B 109.9 . . ?
H14A C14 H14B 108.3 . . ?
N1 C15 C16 115.5(4) . . ?
N1 C15 H15A 108.4 . . ?
C16 C15 H15A 108.4 . . ?
N1 C15 H15B 108.4 . . ?
C16 C15 H15B 108.4 . . ?
H15A C15 H15B 107.5 . . ?
C15 C16 S1 110.9(4) . . ?
C15 C16 H16A 109.5 . . ?
S1 C16 H16A 109.5 . . ?
C15 C16 H16B 109.5 . . ?
S1 C16 H16B 109.5 . . ?
H16A C16 H16B 108.0 . . ?
N2 C21 C22 109.8(4) . . ?
N2 C21 H21A 109.7 . . ?
C22 C21 H21A 109.7 . . ?
N2 C21 H21B 109.7 . . ?
C22 C21 H21B 109.7 . . ?
H21A C21 H21B 108.2 . . ?
O22 C22 C21 109.3(4) . . ?
O22 C22 H22A 109.8 . . ?
C21 C22 H22A 109.8 . . ?
O22 C22 H22B 109.8 . . ?
C21 C22 H22B 109.8 . . ?
H22A C22 H22B 108.3 . . ?
C24 C23 N2 112.0(5) . . ?
C24 C23 H23A 109.2 . . ?
N2 C23 H23A 109.2 . . ?
C24 C23 H23B 109.2 . . ?
N2 C23 H23B 109.2 . . ?
H23A C23 H23B 107.9 . . ?
O24 C24 C23 110.7(4) . . ?
O24 C24 H24A 109.5 . . ?
C23 C24 H24A 109.5 . . ?
O24 C24 H24B 109.5 . . ?
C23 C24 H24B 109.5 . . ?
H24A C24 H24B 108.1 . . ?
N2 C25 C26 112.5(4) . . ?
N2 C25 H25A 109.1 . . ?
C26 C25 H25A 109.1 . . ?
N2 C25 H25B 109.1 . . ?
C26 C25 H25B 109.1 . . ?
H25A C25 H25B 107.8 . . ?
C25 C26 S2 111.9(4) . . ?
C25 C26 H26A 109.2 . . ?
S2 C26 H26A 109.2 . . ?
C25 C26 H26B 109.2 . . ?
S2 C26 H26B 109.2 . . ?
H26A C26 H26B 107.9 . . ?
C13 N1 C15 110.2(4) . . ?
C13 N1 C11 113.2(4) . . ?
C15 N1 C11 109.3(4) . . ?
C13 N1 Cu1 108.4(3) . . ?
C15 N1 Cu1 111.5(3) . . ?
C11 N1 Cu1 104.1(3) . . ?
C25 N2 C21 109.7(4) . . ?
C25 N2 C23 108.3(4) . . ?
C21 N2 C23 109.9(4) . . ?
C25 N2 Cu2 115.3(3) . . ?
C21 N2 Cu2 104.5(3) . . ?
C23 N2 Cu2 109.1(3) . . ?
C1 O1 Cu1 120.9(3) . . ?
C12 O12 Cu2 115.1(3) . 2_755 ?
C12 O12 Cu1 112.3(3) . . ?
Cu2 O12 Cu1 121.65(16) 2_755 . ?
C14 O14 Cu1 105.7(3) . . ?
C14 O14 H14 103.6 . . ?
Cu1 O14 H14 126.8 . . ?
S1 O16 Na1 122.0(3) . 4_755 ?
C22 O22 Cu1 125.3(3) . . ?
C22 O22 Cu2 113.7(3) . . ?
Cu1 O22 Cu2 121.05(17) . . ?
S2 O23 Cu2 122.7(2) . . ?
C24 O24 Cu2 102.6(3) . . ?
C24 O24 H24 102.1 . . ?
Cu2 O24 H24 123.1 . . ?
S2 O26 Na1 140.0(2) . . ?
O13 S1 O16 115.7(3) . . ?
O13 S1 O15 109.3(3) . . ?
O16 S1 O15 112.4(3) . . ?
O13 S1 C16 107.1(3) . . ?
O16 S1 C16 106.0(3) . . ?
O15 S1 C16 105.7(3) . . ?
O26 S2 O25 114.5(2) . . ?
O26 S2 O23 110.1(2) . . ?
O25 S2 O23 111.5(2) . . ?
O26 S2 C26 107.3(3) . . ?
O25 S2 C26 108.1(3) . . ?
O23 S2 C26 104.7(2) . . ?
O22 Cu1 O12 152.07(14) . . ?
O22 Cu1 O1 91.66(14) . . ?
O12 Cu1 O1 93.43(13) . . ?
O22 Cu1 N1 96.15(15) . . ?
O12 Cu1 N1 86.19(14) . . ?
O1 Cu1 N1 163.99(15) . . ?
O22 Cu1 O14 103.98(13) . . ?
O12 Cu1 O14 103.88(13) . . ?
O1 Cu1 O14 83.50(13) . . ?
N1 Cu1 O14 81.06(14) . . ?
O22 Cu2 O12 88.57(13) . 2_755 ?
O22 Cu2 O23 162.07(14) . . ?
O12 Cu2 O23 91.79(14) 2_755 . ?
O22 Cu2 N2 85.90(15) . . ?
O12 Cu2 N2 174.47(16) 2_755 . ?
O23 Cu2 N2 93.41(15) . . ?
O22 Cu2 O24 111.87(14) . . ?
O12 Cu2 O24 100.20(13) 2_755 . ?
O23 Cu2 O24 85.71(13) . . ?
N2 Cu2 O24 82.07(14) . . ?
O26 Na1 O26 180.0(2) 5_856 . ?
O26 Na1 O16 95.05(12) 5_856 4_745 ?
O26 Na1 O16 84.95(12) . 4_745 ?
O26 Na1 O16 84.95(12) 5_856 8_556 ?
O26 Na1 O16 95.05(12) . 8_556 ?
O16 Na1 O16 180.00(11) 4_745 8_556 ?
 
_diffrn_measured_fraction_theta_max    0.996
_diffrn_reflns_theta_full              27.10
_diffrn_measured_fraction_theta_full   0.996
_refine_diff_density_max    0.611
_refine_diff_density_min   -0.462
_refine_diff_density_rms    0.112


 
data_3
 
_audit_creation_method            SHELXL-97 
_chemical_name_systematic 
; 
 ? 
; 
_chemical_name_common             ? 
_chemical_melting_point           ? 
_chemical_formula_moiety          
 'C32 H59 Cu4 N4 O23 S4, (O)3, Na'
_chemical_formula_sum 
 'C32 H59 Cu4 N4 Na O26 S4' 
_chemical_formula_weight          1321.22 
 
loop_ 
 _atom_type_symbol 
 _atom_type_description 
 _atom_type_scat_dispersion_real 
 _atom_type_scat_dispersion_imag 
 _atom_type_scat_source 
 'C'  'C'   0.0033   0.0016 
 'International Tables Vol C Tables 4.2.6.8 and 6.1.1.4' 
 'H'  'H'   0.0000   0.0000 
 'International Tables Vol C Tables 4.2.6.8 and 6.1.1.4' 
 'N'  'N'   0.0061   0.0033 
 'International Tables Vol C Tables 4.2.6.8 and 6.1.1.4' 
 'O'  'O'   0.0106   0.0060 
 'International Tables Vol C Tables 4.2.6.8 and 6.1.1.4' 
 'Na'  'Na'   0.0362   0.0249 
 'International Tables Vol C Tables 4.2.6.8 and 6.1.1.4' 
 'Cu'  'Cu'   0.3201   1.2651 
 'International Tables Vol C Tables 4.2.6.8 and 6.1.1.4' 
 'S'  'S'   0.1246   0.1234 
 'International Tables Vol C Tables 4.2.6.8 and 6.1.1.4' 

_symmetry_cell_setting            monoclinic
_symmetry_space_group_name_H-M    'C 2/c'
_symmetry_space_group_name_Hall   '-C 2yc' 

loop_ 
 _symmetry_equiv_pos_as_xyz 
 'x, y, z' 
 '-x, y, -z+1/2' 
 'x+1/2, y+1/2, z' 
 '-x+1/2, y+1/2, -z+1/2' 
 '-x, -y, -z' 
 'x, -y, z-1/2' 
 '-x+1/2, -y+1/2, -z' 
 'x+1/2, -y+1/2, z-1/2' 
 
_cell_length_a                    18.6049(12) 
_cell_length_b                    21.0872(11) 
_cell_length_c                    14.0954(9) 
_cell_angle_alpha                 90.00 
_cell_angle_beta                  118.396(2) 
_cell_angle_gamma                 90.00 
_cell_volume                      4864.6(5) 
_cell_formula_units_Z             4 
_cell_measurement_temperature     150(2) 
_cell_measurement_reflns_used     6191
_cell_measurement_theta_min       2.49
_cell_measurement_theta_max       26.35

 
_exptl_crystal_description        prism 
_exptl_crystal_colour             green
_exptl_crystal_size_max           0.21 
_exptl_crystal_size_mid           0.18 
_exptl_crystal_size_min           0.15 
_exptl_crystal_density_meas       ? 
_exptl_crystal_density_diffrn     1.804 
_exptl_crystal_density_method     'not measured' 
_exptl_crystal_F_000              2712 
_exptl_absorpt_coefficient_mu     1.997 
_exptl_absorpt_correction_type    multi-scan 
_exptl_absorpt_correction_T_min   0.6587
_exptl_absorpt_correction_T_max   0.7454 
_exptl_absorpt_process_details    sadabs 
 
_exptl_special_details 
; 
 ? 
; 
 
_diffrn_ambient_temperature       150(2) 
_diffrn_radiation_wavelength      0.71073 
_diffrn_radiation_type            MoK\a 
_diffrn_radiation_source          'fine-focus sealed tube' 
_diffrn_radiation_monochromator   graphite 
_diffrn_measurement_device_type   ? 
_diffrn_measurement_method        ? 
_diffrn_detector_area_resol_mean  ? 
_diffrn_standards_number          ? 
_diffrn_standards_interval_count  ? 
_diffrn_standards_interval_time   ? 
_diffrn_standards_decay_%         ? 
_diffrn_reflns_number             19293 
_diffrn_reflns_av_R_equivalents   0.0415 
_diffrn_reflns_av_sigmaI/netI     0.0425 
_diffrn_reflns_limit_h_min        -23 
_diffrn_reflns_limit_h_max        23 
_diffrn_reflns_limit_k_min        -26 
_diffrn_reflns_limit_k_max        20 
_diffrn_reflns_limit_l_min        -17 
_diffrn_reflns_limit_l_max        17 
_diffrn_reflns_theta_min          2.49 
_diffrn_reflns_theta_max          26.41 
_reflns_number_total              5001 
_reflns_number_gt                 3821 
_reflns_threshold_expression      >2sigma(I) 
 
_computing_data_collection        ? 
_computing_cell_refinement        ? 
_computing_data_reduction         ? 
_computing_structure_solution     'SHELXS-97 (Sheldrick, 1990)' 
_computing_structure_refinement   'SHELXL-97 (Sheldrick, 1997)' 
_computing_molecular_graphics     ? 
_computing_publication_material   ? 
 
_refine_special_details 
; 
 Refinement of F^2^ against ALL reflections.  The weighted R-factor wR and 
 goodness of fit S are based on F^2^, conventional R-factors R are based 
 on F, with F set to zero for negative F^2^. The threshold expression of 
 F^2^ > 2sigma(F^2^) is used only for calculating R-factors(gt) etc. and is 
 not relevant to the choice of reflections for refinement.  R-factors based 
 on F^2^ are statistically about twice as large as those based on F, and R- 
 factors based on ALL data will be even larger. 


PLAT430_ALERT_2_A Short Inter D...A Contact  O2WA   ..  O8B     ..       2.04 Ang.
RESPONSE: The site occupancies for O2WA and O8B are 0.5 and 0.354(13), 
respectively, so this contact does not exist

PLAT430_ALERT_2_A Short Inter D...A Contact  O2WA   ..  O2WB    ..       2.25 Ang. 
RESPONSE: This short contact is the consequence of disordering of the O2W 
water molecule

PLAT201_ALERT_2_B Isotropic non-H Atoms in Main Residue(s) .......          5      
RESPONSE: Due to disordering of SO3 and CH2 groups anisotropic 
refinement for some atomic positions is impossible
          
PLAT222_ALERT_3_B Large Non-Solvent    H     Ueq(max)/Ueq(min) ...       4.61 Ratio
RESPONSE: Large non-solvent H occures due to disorder of the CH2 groups 

PLAT213_ALERT_2_C Atom C9A             has ADP max/min Ratio .....       3.10 prola
PLAT220_ALERT_2_C Large Non-Solvent    C     Ueq(max)/Ueq(min) ...       3.25 Ratio
PLAT242_ALERT_2_C Check Low       Ueq as Compared to Neighbors for         O6     
PLAT242_ALERT_2_C Check Low       Ueq as Compared to Neighbors for        C7A     
PLAT341_ALERT_3_C Low Bond Precision on  C-C Bonds (x 1000) Ang ..         11      
PLAT076_ALERT_1_C Occupancy       0.50 less than 1.0 for Sp.pos  .        NA1      
PLAT774_ALERT_1_C Suspect X-Y Bond in CIF:   NA1    --  NA2     ..       3.75 Ang. 

RESPONSE: These alerts are the consequence of the disorder of solvent water molecules
and sodium cations as well as ligand C-C and SO3 groups, where some bond distances 
were restrained.

PLAT790_ALERT_4_C Centre of Gravity not Within Unit Cell: Resd.  #          2      
PLAT790_ALERT_4_C Centre of Gravity not Within Unit Cell: Resd.  #          4      

RESPONSE: The positions of the sodium and water species were chosen on the basis of 
relevant intermolecular interactions with the main molecule.
; 
 
_refine_ls_structure_factor_coef  Fsqd  
_refine_ls_matrix_type            full 
_refine_ls_weighting_scheme       calc  
_refine_ls_weighting_details 
 'calc w=1/[\s^2^(Fo^2^)+(0.0496P)^2^+69.4624P] where P=(Fo^2^+2Fc^2^)/3' 
_atom_sites_solution_primary      direct 
_atom_sites_solution_secondary    difmap 
_atom_sites_solution_hydrogens    geom 
_refine_ls_hydrogen_treatment     mixed 
_refine_ls_extinction_method      none 
_refine_ls_extinction_coef        ? 
_refine_ls_number_reflns          5001 
_refine_ls_number_parameters      409 
_refine_ls_number_restraints      26 
_refine_ls_R_factor_all           0.0841 
_refine_ls_R_factor_gt            0.0624 
_refine_ls_wR_factor_ref          0.1549 
_refine_ls_wR_factor_gt           0.1431 
_refine_ls_goodness_of_fit_ref    1.041 
_refine_ls_restrained_S_all       1.060 
_refine_ls_shift/su_max           0.001 
_refine_ls_shift/su_mean          0.000 
 
loop_ 
 _atom_site_label 
 _atom_site_type_symbol 
 _atom_site_fract_x 
 _atom_site_fract_y 
 _atom_site_fract_z 
 _atom_site_U_iso_or_equiv 
 _atom_site_adp_type 
 _atom_site_occupancy 
 _atom_site_symmetry_multiplicity 
 _atom_site_calc_flag 
 _atom_site_refinement_flags 
 _atom_site_disorder_assembly 
 _atom_site_disorder_group 
Cu1 Cu 0.45767(4) 0.13708(3) 0.12515(5) 0.0265(2) Uani 1 1 d . . . 
N1 N 0.4384(3) 0.2201(3) 0.0380(4) 0.0320(11) Uani 1 1 d . . . 
S1 S 0.60727(13) 0.33224(11) 0.01539(18) 0.0628(6) Uani 1 1 d D . . 
O1 O 0.3539(3) 0.1039(3) -0.0393(4) 0.0432(11) Uani 1 1 d . . . 
C1 C 0.3736(4) 0.2104(4) -0.0752(5) 0.0481(18) Uani 1 1 d . . . 
H1A H 0.3999 0.1975 -0.1189 0.058 Uiso 1 1 calc R . . 
H1B H 0.3460 0.2515 -0.1039 0.058 Uiso 1 1 calc R . . 
O1W O 0.0318(7) 0.0705(6) 0.2370(10) 0.079(4) Uani 0.50 1 d P . . 
Cu2 Cu 0.33963(4) 0.13053(3) 0.24675(5) 0.02565(19) Uani 1 1 d . B . 
N2 N 0.2886(3) 0.0776(3) 0.3172(4) 0.0445(14) Uani 1 1 d D . . 
S2 S 0.19847(10) 0.06834(8) 0.04858(13) 0.0358(4) Uani 1 1 d D . . 
C2 C 0.3109(4) 0.1627(4) -0.0897(6) 0.0483(18) Uani 1 1 d . . . 
H2A H 0.2784 0.1773 -0.0551 0.058 Uiso 1 1 calc R . . 
H2B H 0.2735 0.1557 -0.1673 0.058 Uiso 1 1 calc R . . 
O2 O 0.3982(2) 0.17795(19) 0.1898(3) 0.0270(8) Uani 1 1 d . . . 
C3 C 0.4136(4) 0.2672(3) 0.0963(5) 0.0343(14) Uani 1 1 d . . . 
H3A H 0.3818 0.3017 0.0462 0.041 Uiso 1 1 calc R B . 
H3B H 0.4631 0.2861 0.1561 0.041 Uiso 1 1 calc R . . 
O3A O 0.5921(8) 0.3939(5) -0.0360(10) 0.065(4) Uiso 0.55(2) 1 d PD . 1 
O5A O 0.6548(6) 0.3310(6) 0.1276(6) 0.052(3) Uiso 0.55(2) 1 d PD . 1 
O4A O 0.6325(9) 0.2814(5) -0.0364(12) 0.075(4) Uiso 0.55(2) 1 d PD . 1 
O3B O 0.6032(8) 0.3833(5) -0.0542(9) 0.045(4) Uiso 0.45(2) 1 d PD . 2 
O5B O 0.6378(8) 0.3583(7) 0.1294(7) 0.047(4) Uiso 0.45(2) 1 d PD . 2 
O4B O 0.6636(7) 0.2833(4) 0.0245(12) 0.047(4) Uiso 0.45(2) 1 d PD . 2 
C4 C 0.3625(4) 0.2363(3) 0.1411(5) 0.0319(13) Uani 1 1 d . B . 
H4A H 0.3593 0.2646 0.1950 0.038 Uiso 1 1 calc R . . 
H4B H 0.3063 0.2290 0.0822 0.038 Uiso 1 1 calc R . . 
C5 C 0.5145(4) 0.2425(3) 0.0382(5) 0.0392(16) Uani 1 1 d . . . 
H5A H 0.5319 0.2098 0.0030 0.047 Uiso 1 1 calc R . . 
H5B H 0.5580 0.2460 0.1140 0.047 Uiso 1 1 calc R . . 
C6 C 0.5080(4) 0.3051(4) -0.0171(5) 0.0454(18) Uani 1 1 d . . . 
H6A H 0.4805 0.3366 0.0068 0.055 Uiso 1 1 calc R . . 
H6B H 0.4750 0.2999 -0.0962 0.055 Uiso 1 1 calc R . . 
O6 O 0.4415(2) 0.11416(19) 0.3726(3) 0.0286(9) Uani 1 1 d . . . 
O7 O 0.2736(3) 0.2120(2) 0.2892(4) 0.0398(11) Uani 1 1 d . . . 
H7 H 0.2989 0.2419 0.3313 0.12(5) Uiso 1 1 calc R A 1 
C8A C 0.4355(4) 0.0749(4) 0.4480(7) 0.061(3) Uani 0.646(13) 1 d PD B 1 
H8AA H 0.4368 0.1009 0.5073 0.073 Uiso 0.646(13) 1 calc PR B 1 
H8AB H 0.4826 0.0454 0.4791 0.073 Uiso 0.646(13) 1 calc PR B 1 
C10A C 0.2250(5) 0.1810(5) 0.3259(7) 0.065(3) Uani 0.646(13) 1 d PD B 1 
H10A H 0.1710 0.1714 0.2639 0.078 Uiso 0.646(13) 1 calc PR B 1 
H10B H 0.2164 0.2093 0.3756 0.078 Uiso 0.646(13) 1 calc PR B 1 
O8A O 0.1121(5) 0.0774(5) 0.0034(10) 0.059(3) Uani 0.646(13) 1 d P B 1 
O9A O 0.2277(10) 0.0448(8) -0.0193(12) 0.071(4) Uani 0.646(13) 1 d P B 1 
C7A C 0.3602(4) 0.0391(4) 0.3972(8) 0.034(2) Uiso 0.646(13) 1 d PD B 1 
H7AA H 0.3477 0.0229 0.4536 0.041 Uiso 0.646(13) 1 calc PR B 1 
H7AB H 0.3678 0.0021 0.3597 0.041 Uiso 0.646(13) 1 calc PR B 1 
C9A C 0.2651(7) 0.1199(6) 0.3838(9) 0.061(4) Uani 0.646(13) 1 d PD B 1 
H9AA H 0.3145 0.1303 0.4522 0.073 Uiso 0.646(13) 1 calc PR B 1 
H9AB H 0.2269 0.0968 0.4019 0.073 Uiso 0.646(13) 1 calc PR B 1 
C11A C 0.2201(7) 0.0346(7) 0.2514(10) 0.064(4) Uiso 0.646(13) 1 d PD B 1 
H11A H 0.1675 0.0572 0.2262 0.076 Uiso 0.646(13) 1 calc PR B 1 
H11B H 0.2205 -0.0022 0.2954 0.076 Uiso 0.646(13) 1 calc PR B 1 
C12A C 0.2288(10) 0.0124(6) 0.1576(11) 0.065(4) Uani 0.646(13) 1 d PD B 1 
H12A H 0.1959 -0.0266 0.1290 0.078 Uiso 0.646(13) 1 calc PR B 1 
H12B H 0.2867 0.0009 0.1831 0.078 Uiso 0.646(13) 1 calc PR B 1 
C8B C 0.4355(4) 0.0749(4) 0.4480(7) 0.061(3) Uani 0.354(13) 1 d P B 2 
H8BA H 0.4675 0.0940 0.5204 0.073 Uiso 0.354(13) 1 calc PR B 2 
H8BB H 0.4607 0.0335 0.4484 0.073 Uiso 0.354(13) 1 calc PR B 2 
C10B C 0.2250(5) 0.1810(5) 0.3259(7) 0.065(3) Uani 0.354(13) 1 d P B 2 
H10C H 0.1709 0.2020 0.2932 0.078 Uiso 0.354(13) 1 calc PR B 2 
H10D H 0.2502 0.1871 0.4049 0.078 Uiso 0.354(13) 1 calc PR B 2 
O8B O 0.1198(8) 0.0787(6) -0.0535(12) 0.033(3) Uani 0.354(13) 1 d P . 2 
O9B O 0.2552(14) 0.0320(11) 0.0224(17) 0.038(5) Uani 0.354(13) 1 d P B 2 
C7B C 0.3515(8) 0.0636(12) 0.4290(9) 0.051(6) Uiso 0.354(13) 1 d PD B 2 
H7BA H 0.3413 0.0904 0.4792 0.061 Uiso 0.354(13) 1 calc PR B 2 
H7BB H 0.3463 0.0187 0.4455 0.061 Uiso 0.354(13) 1 calc PR B 2 
C9B C 0.2124(11) 0.1136(9) 0.3034(19) 0.057(7) Uani 0.354(13) 1 d PD B 2 
H9BA H 0.1683 0.1078 0.2285 0.069 Uiso 0.354(13) 1 calc PR B 2 
H9BB H 0.1936 0.0946 0.3520 0.069 Uiso 0.354(13) 1 calc PR B 2 
C11B C 0.2490(10) 0.0201(5) 0.2496(11) 0.024(4) Uiso 0.354(13) 1 d PD B 2 
H11C H 0.2311 -0.0066 0.2922 0.029 Uiso 0.354(13) 1 calc PR B 2 
H11D H 0.2932 -0.0037 0.2452 0.029 Uiso 0.354(13) 1 calc PR B 2 
C12B C 0.1770(11) 0.0218(8) 0.1343(11) 0.027(4) Uani 0.354(13) 1 d PD B 2 
H11E H 0.1282 0.0390 0.1363 0.032 Uiso 0.354(13) 1 calc PR B 2 
H11F H 0.1642 -0.0219 0.1055 0.032 Uiso 0.354(13) 1 calc PR B 2 
O10 O 0.2383(3) 0.1280(2) 0.1029(3) 0.0330(9) Uani 1 1 d . B . 
O11 O 0.4442(2) 0.0501(2) 0.1702(3) 0.0330(10) Uani 1 1 d . . . 
O12 O 0.3836(12) -0.0789(9) 0.1699(16) 0.026(4) Uiso 0.50 1 d P . . 
C13 C 0.5000 0.0216(4) 0.2500 0.0252(17) Uani 1 2 d S . . 
C14 C 0.5202(5) -0.0488(5) 0.2639(10) 0.020(3) Uani 0.50 1 d P . . 
C15 C 0.604(2) -0.0659(12) 0.320(2) 0.041(7) Uani 0.50 1 d P B . 
H15A H 0.6452 -0.0342 0.3494 0.049 Uiso 0.50 1 calc PR . . 
C16 C 0.6247(10) -0.1299(7) 0.3324(11) 0.036(3) Uani 0.50 1 d P . . 
H16A H 0.6806 -0.1422 0.3691 0.043 Uiso 0.50 1 calc PR B . 
C17 C 0.5645(9) -0.1755(7) 0.2912(11) 0.032(3) Uani 0.50 1 d P B . 
H17A H 0.5799 -0.2190 0.3007 0.039 Uiso 0.50 1 calc PR . . 
C18 C 0.4828(7) -0.1603(6) 0.2368(17) 0.022(4) Uani 0.50 1 d P . . 
H18A H 0.4423 -0.1926 0.2094 0.026 Uiso 0.50 1 calc PR B . 
C19 C 0.4607(7) -0.0961(6) 0.2228(9) 0.026(2) Uani 0.50 1 d P B . 
C20 C 0.3219(10) -0.1262(7) 0.1408(12) 0.040(3) Uani 0.50 1 d P . . 
H20A H 0.2698 -0.1096 0.0847 0.060 Uiso 0.50 1 calc PR . . 
H20B H 0.3163 -0.1378 0.2043 0.060 Uiso 0.50 1 calc PR . . 
H20C H 0.3373 -0.1637 0.1136 0.060 Uiso 0.50 1 calc PR . . 
Na1 Na 0.0000 0.0000 0.0000 0.34(3) Uani 0.50 2 d SP . . 
Na2 Na 0.5857(14) 0.3991(11) 0.2492(18) 0.092(6) Uani 0.25 1 d P . . 
O2WA O 0.0280(10) 0.0303(8) -0.1775(13) 0.098(5) Uiso 0.50 1 d P . 1 
O2WB O 0.0719(14) 0.0672(12) -0.2907(17) 0.126(9) Uani 0.50 1 d P . 2 
H1 H 0.320(5) 0.083(4) -0.033(6) 0.04(2) Uiso 1 1 d . . . 
 
loop_ 
 _atom_site_aniso_label 
 _atom_site_aniso_U_11 
 _atom_site_aniso_U_22 
 _atom_site_aniso_U_33 
 _atom_site_aniso_U_23 
 _atom_site_aniso_U_13 
 _atom_site_aniso_U_12 
Cu1 0.0247(4) 0.0375(4) 0.0191(3) 0.0043(3) 0.0118(3) 0.0015(3) 
N1 0.028(3) 0.048(3) 0.021(2) 0.009(2) 0.012(2) 0.001(2) 
S1 0.0499(11) 0.0821(15) 0.0658(14) 0.0338(12) 0.0354(11) -0.0021(11) 
O1 0.042(3) 0.053(3) 0.030(2) -0.003(2) 0.014(2) -0.007(2) 
C1 0.043(4) 0.071(5) 0.023(3) 0.015(3) 0.009(3) 0.001(4) 
O1W 0.070(9) 0.092(9) 0.045(7) -0.004(7) 0.003(6) 0.027(7) 
Cu2 0.0248(4) 0.0334(4) 0.0226(3) 0.0069(3) 0.0144(3) 0.0028(3) 
N2 0.039(3) 0.057(4) 0.047(3) 0.010(3) 0.028(3) -0.004(3) 
S2 0.0321(8) 0.0381(9) 0.0342(8) -0.0011(7) 0.0133(7) -0.0002(7) 
C2 0.040(4) 0.063(5) 0.032(4) 0.010(3) 0.008(3) 0.000(3) 
O2 0.028(2) 0.031(2) 0.026(2) 0.0062(17) 0.0167(17) 0.0021(17) 
C3 0.036(3) 0.036(3) 0.035(3) 0.014(3) 0.020(3) 0.006(3) 
C4 0.036(3) 0.034(3) 0.034(3) 0.011(3) 0.023(3) 0.008(3) 
C5 0.032(3) 0.057(4) 0.035(3) 0.017(3) 0.021(3) 0.004(3) 
C6 0.038(4) 0.064(5) 0.032(4) 0.015(3) 0.015(3) -0.006(3) 
O6 0.029(2) 0.037(2) 0.022(2) 0.0114(17) 0.0142(17) 0.0057(17) 
O7 0.035(2) 0.053(3) 0.029(2) -0.006(2) 0.014(2) 0.009(2) 
C8A 0.047(4) 0.080(6) 0.070(5) 0.056(5) 0.038(4) 0.028(4) 
C10A 0.054(5) 0.099(7) 0.060(5) 0.037(5) 0.041(4) 0.038(5) 
O8A 0.036(5) 0.060(6) 0.064(7) -0.004(5) 0.010(5) -0.002(4) 
O9A 0.079(11) 0.081(12) 0.076(11) -0.044(8) 0.056(9) -0.023(8) 
C9A 0.039(7) 0.118(12) 0.041(7) 0.041(7) 0.032(6) 0.034(7) 
C12A 0.064(10) 0.035(7) 0.093(12) -0.007(7) 0.034(9) -0.013(7) 
C8B 0.047(4) 0.080(6) 0.070(5) 0.056(5) 0.038(4) 0.028(4) 
C10B 0.054(5) 0.099(7) 0.060(5) 0.037(5) 0.041(4) 0.038(5) 
O8B 0.027(7) 0.039(7) 0.020(7) -0.001(6) 0.003(6) -0.005(5) 
O9B 0.048(12) 0.025(7) 0.038(11) 0.011(8) 0.019(9) 0.008(7) 
C9B 0.037(12) 0.09(2) 0.046(14) -0.021(13) 0.024(11) -0.012(12) 
C12B 0.035(10) 0.029(9) 0.031(9) 0.000(7) 0.027(9) -0.006(8) 
O10 0.038(2) 0.034(2) 0.026(2) 0.0044(18) 0.0140(19) 0.0011(19) 
O11 0.029(2) 0.039(2) 0.029(2) 0.0025(19) 0.0122(19) -0.0030(19) 
C13 0.033(4) 0.023(4) 0.027(4) 0.000 0.021(4) 0.000 
C14 0.015(8) 0.035(6) 0.012(7) 0.003(5) 0.009(7) 0.001(4) 
C15 0.062(16) 0.022(12) 0.044(12) 0.004(9) 0.030(11) 0.000(11) 
C16 0.037(8) 0.043(10) 0.029(7) 0.006(6) 0.017(6) 0.014(7) 
C17 0.042(9) 0.036(7) 0.021(7) 0.000(6) 0.015(8) 0.000(7) 
C18 0.013(14) 0.032(6) 0.014(13) -0.006(5) 0.001(13) 0.002(5) 
C19 0.035(6) 0.022(6) 0.028(6) 0.003(5) 0.021(5) -0.001(5) 
C20 0.039(8) 0.035(8) 0.045(8) -0.002(6) 0.020(7) -0.011(7) 
Na1 0.137(19) 0.114(17) 0.71(8) 0.04(3) 0.16(3) -0.031(14) 
Na2 0.094(14) 0.100(16) 0.077(14) -0.010(11) 0.036(12) 0.010(12) 
O2WB 0.104(15) 0.16(2) 0.084(14) -0.031(13) 0.017(12) 0.033(15) 
 
_geom_special_details 
; 
 All esds (except the esd in the dihedral angle between two l.s. planes) 
 are estimated using the full covariance matrix.  The cell esds are taken 
 into account individually in the estimation of esds in distances, angles 
 and torsion angles; correlations between esds in cell parameters are only 
 used when they are defined by crystal symmetry.  An approximate (isotropic) 
 treatment of cell esds is used for estimating esds involving l.s. planes. 
; 
 
loop_ 
 _geom_bond_atom_site_label_1 
 _geom_bond_atom_site_label_2 
 _geom_bond_distance 
 _geom_bond_site_symmetry_2 
 _geom_bond_publ_flag 
Cu1 O6 1.923(4) 2_655 ? 
Cu1 O2 1.939(4) . ? 
Cu1 O11 1.995(4) . ? 
Cu1 N1 2.070(5) . ? 
Cu1 O1 2.310(5) . ? 
N1 C1 1.486(8) . ? 
N1 C5 1.492(7) . ? 
N1 C3 1.495(8) . ? 
S1 O5A 1.398(7) . ? 
S1 O4B 1.434(7) . ? 
S1 O3B 1.434(7) . ? 
S1 O3A 1.450(8) . ? 
S1 O4A 1.494(8) . ? 
S1 O5B 1.530(8) . ? 
S1 C6 1.772(7) . ? 
O1 C2 1.462(9) . ? 
C1 C2 1.480(10) . ? 
O1W O1W 1.40(3) 2 ? 
Cu2 O6 1.913(4) . ? 
Cu2 O2 1.914(4) . ? 
Cu2 N2 2.007(5) . ? 
Cu2 O10 2.008(4) . ? 
Cu2 O7 2.349(4) . ? 
N2 C11A 1.478(5) . ? 
N2 C7B 1.479(5) . ? 
N2 C11B 1.501(5) . ? 
N2 C9A 1.503(11) . ? 
N2 C7A 1.509(5) . ? 
N2 C9B 1.537(15) . ? 
S2 O9A 1.398(15) . ? 
S2 O8A 1.432(9) . ? 
S2 O10 1.475(4) . ? 
S2 O9B 1.49(3) . ? 
S2 O8B 1.503(13) . ? 
S2 C12B 1.744(12) . ? 
S2 C12A 1.802(12) . ? 
O2 C4 1.412(7) . ? 
C3 C4 1.516(8) . ? 
O3A Na1 3.004(14) 3 ? 
O5A Na2 2.96(2) . ? 
O5B Na2 2.47(2) . ? 
C5 C6 1.510(9) . ? 
O6 C8A 1.393(7) . ? 
O6 Cu1 1.923(4) 2_655 ? 
O7 C10A 1.397(9) . ? 
C8A C7A 1.446(11) . ? 
C10A C9A 1.518(12) . ? 
O8A Na1 2.631(10) . ? 
C11A C12A 1.483(15) . ? 
O8B Na2 2.58(3) 8_455 ? 
C11B C12B 1.539(16) . ? 
O11 C13 1.262(5) . ? 
O12 C15 0.34(4) 2_655 ? 
O12 C16 1.09(2) 2_655 ? 
O12 C19 1.32(2) . ? 
O12 C20 1.43(2) . ? 
O12 C14 1.70(2) 2_655 ? 
C13 O11 1.262(5) 2_655 ? 
C13 C14 1.521(13) . ? 
C14 C19 1.395(14) . ? 
C14 C15 1.42(3) . ? 
C15 C16 1.39(3) . ? 
C16 C17 1.38(2) . ? 
C17 C18 1.38(2) . ? 
C18 C19 1.401(17) . ? 
Na1 O8A 2.631(10) 5 ? 
Na1 O2WA 2.860(16) 5 ? 
Na1 O2WA 2.860(16) . ? 
Na1 C12B 2.951(17) 5 ? 
Na1 O2WB 2.96(2) 2_554 ? 
Na1 O2WB 2.96(2) 6_556 ? 
Na1 O3A 3.004(14) 3_445 ? 
Na1 O3A 3.004(14) 7 ? 
Na1 Na2 3.75(2) 7 ? 
Na2 O2WB 0.87(2) 8_556 ? 
Na2 O2WA 2.34(3) 8_556 ? 
Na2 O2WA 2.38(3) 7 ? 
Na2 O8B 2.58(3) 8_556 ? 
Na2 Na2 3.20(5) 2_655 ? 
O2WA O2WA 1.80(3) 2_554 ? 
O2WA Na2 2.34(3) 8_455 ? 
O2WA Na2 2.38(3) 7 ? 
O2WB Na2 0.87(2) 8_455 ? 
O2WB Na1 2.96(2) 2_554 ? 

 
loop_ 
 _geom_angle_atom_site_label_1 
 _geom_angle_atom_site_label_2 
 _geom_angle_atom_site_label_3 
 _geom_angle 
 _geom_angle_site_symmetry_1 
 _geom_angle_site_symmetry_3 
 _geom_angle_publ_flag 
O6 Cu1 O2 151.00(16) 2_655 . ? 
O6 Cu1 O11 91.88(17) 2_655 . ? 
O2 Cu1 O11 94.18(17) . . ? 
O6 Cu1 N1 96.59(18) 2_655 . ? 
O2 Cu1 N1 85.80(18) . . ? 
O11 Cu1 N1 162.51(19) . . ? 
O6 Cu1 O1 106.49(17) 2_655 . ? 
O2 Cu1 O1 102.41(17) . . ? 
O11 Cu1 O1 82.49(18) . . ? 
N1 Cu1 O1 80.4(2) . . ? 
C1 N1 C5 109.3(5) . . ? 
C1 N1 C3 112.1(5) . . ? 
C5 N1 C3 109.2(5) . . ? 
C1 N1 Cu1 110.2(4) . . ? 
C5 N1 Cu1 111.7(4) . . ? 
C3 N1 Cu1 104.3(3) . . ? 
O4B S1 O3B 113.6(7) . . ? 
O5A S1 O3A 116.8(7) . . ? 
O4B S1 O3A 130.6(7) . . ? 
O5A S1 O4A 111.3(6) . . ? 
O3A S1 O4A 115.6(7) . . ? 
O4B S1 O5B 105.9(6) . . ? 
O3B S1 O5B 108.7(7) . . ? 
O5A S1 C6 107.9(5) . . ? 
O4B S1 C6 114.7(6) . . ? 
O3B S1 C6 110.8(6) . . ? 
O3A S1 C6 103.2(6) . . ? 
O4A S1 C6 100.0(6) . . ? 
O5B S1 C6 102.0(5) . . ? 
C2 O1 Cu1 103.5(4) . . ? 
N1 C1 C2 115.1(5) . . ? 
O6 Cu2 O2 88.42(16) . . ? 
O6 Cu2 N2 86.23(18) . . ? 
O2 Cu2 N2 174.50(19) . . ? 
O6 Cu2 O10 166.34(18) . . ? 
O2 Cu2 O10 92.24(17) . . ? 
N2 Cu2 O10 92.68(19) . . ? 
O6 Cu2 O7 107.66(16) . . ? 
O2 Cu2 O7 101.31(17) . . ? 
N2 Cu2 O7 81.5(2) . . ? 
O10 Cu2 O7 85.60(16) . . ? 
C7B N2 C11B 114.6(12) . . ? 
C11A N2 C9A 109.6(8) . . ? 
C11A N2 C7A 109.3(8) . . ? 
C9A N2 C7A 105.6(7) . . ? 
C7B N2 C9B 116.6(13) . . ? 
C11B N2 C9B 100.1(10) . . ? 
C11A N2 Cu2 120.1(6) . . ? 
C7B N2 Cu2 108.5(7) . . ? 
C11B N2 Cu2 109.9(7) . . ? 
C9A N2 Cu2 109.0(6) . . ? 
C7A N2 Cu2 102.2(5) . . ? 
C9B N2 Cu2 106.7(9) . . ? 
O9A S2 O8A 117.6(8) . . ? 
O9A S2 O10 113.3(7) . . ? 
O8A S2 O10 107.3(4) . . ? 
O10 S2 O9B 109.1(10) . . ? 
O10 S2 O8B 113.1(6) . . ? 
O9B S2 O8B 108.7(9) . . ? 
O10 S2 C12B 110.1(6) . . ? 
O9B S2 C12B 107.8(10) . . ? 
O8B S2 C12B 107.8(8) . . ? 
O10 S2 C12A 103.9(5) . . ? 
O1 C2 C1 107.3(6) . . ? 
C4 O2 Cu2 115.4(3) . . ? 
C4 O2 Cu1 113.6(3) . . ? 
Cu2 O2 Cu1 122.1(2) . . ? 
N1 C3 C4 111.2(5) . . ? 
S1 O3A Na1 125.1(8) . 3 ? 
S1 O5A Na2 115.6(8) . . ? 
S1 O5B Na2 140.7(9) . . ? 
O2 C4 C3 109.5(5) . . ? 
N1 C5 C6 115.7(5) . . ? 
C5 C6 S1 109.3(5) . . ? 
C8A O6 Cu2 114.3(4) . . ? 
C8A O6 Cu1 124.7(4) . 2_655 ? 
Cu2 O6 Cu1 119.90(19) . 2_655 ? 
C10A O7 Cu2 105.2(5) . . ? 
O6 C8A C7A 110.0(7) . . ? 
O7 C10A C9A 110.9(6) . . ? 
S2 O8A Na1 129.6(6) . . ? 
C8A C7A N2 113.1(6) . . ? 
N2 C9A C10A 112.5(7) . . ? 
N2 C11A C12A 109.0(10) . . ? 
C11A C12A S2 115.5(10) . . ? 
S2 O8B Na2 133.3(10) . 8_455 ? 
N2 C11B C12B 124.7(11) . . ? 
C11B C12B S2 111.9(12) . . ? 
S2 O10 Cu2 123.1(3) . . ? 
C13 O11 Cu1 123.1(4) . . ? 
C15 O12 C16 150(10) 2_655 2_655 ? 
C15 O12 C19 69(8) 2_655 . ? 
C16 O12 C19 81.0(17) 2_655 . ? 
C15 O12 C20 167(9) 2_655 . ? 
C19 O12 C20 118.7(18) . . ? 
C16 O12 C14 118.9(19) 2_655 2_655 ? 
C20 O12 C14 155.8(17) . 2_655 ? 
O11 C13 O11 123.2(7) . 2_655 ? 
O11 C13 C14 128.9(6) . . ? 
O11 C13 C14 107.6(5) 2_655 . ? 
C19 C14 C15 119.6(15) . . ? 
C19 C14 C13 123.1(7) . . ? 
C15 C14 C13 117.3(13) . . ? 
C16 C15 C14 119(2) . . ? 
C17 C16 C15 120.1(18) . . ? 
C18 C17 C16 122.3(14) . . ? 
C17 C18 C19 118.4(13) . . ? 
O12 C19 C14 118.2(12) . . ? 
O12 C19 C18 121.0(13) . . ? 
C14 C19 C18 120.8(10) . . ? 
O8A Na1 O8A 179.999(1) . 5 ? 
O8A Na1 O2WA 126.6(4) . 5 ? 
O8A Na1 O2WA 53.4(4) 5 5 ? 
O8A Na1 O2WA 53.4(4) . . ? 
O8A Na1 O2WA 126.6(4) 5 . ? 
O2WA Na1 O2WA 179.999(2) 5 . ? 
O8A Na1 C12B 137.9(3) . 5 ? 
O8A Na1 C12B 42.2(3) 5 5 ? 
O2WA Na1 C12B 85.1(4) 5 5 ? 
O2WA Na1 C12B 94.9(4) . 5 ? 
O8A Na1 O2WB 72.5(5) . 2_554 ? 
O8A Na1 O2WB 107.5(5) 5 2_554 ? 
O2WA Na1 O2WB 142.7(6) 5 2_554 ? 
O2WA Na1 O2WB 37.3(6) . 2_554 ? 
C12B Na1 O2WB 66.3(5) 5 2_554 ? 
O8A Na1 O2WB 107.5(5) . 6_556 ? 
O8A Na1 O2WB 72.5(5) 5 6_556 ? 
O2WA Na1 O2WB 37.3(6) 5 6_556 ? 
O2WA Na1 O2WB 142.7(6) . 6_556 ? 
C12B Na1 O2WB 113.7(5) 5 6_556 ? 
O2WB Na1 O2WB 180.000(1) 2_554 6_556 ? 
O8A Na1 O3A 87.4(3) . 3_445 ? 
O8A Na1 O3A 92.6(3) 5 3_445 ? 
O2WA Na1 O3A 109.7(4) 5 3_445 ? 
O2WA Na1 O3A 70.3(4) . 3_445 ? 
C12B Na1 O3A 109.1(4) 5 3_445 ? 
O2WB Na1 O3A 102.2(6) 2_554 3_445 ? 
O2WB Na1 O3A 77.8(6) 6_556 3_445 ? 
O8A Na1 O3A 92.6(3) . 7 ? 
O8A Na1 O3A 87.4(3) 5 7 ? 
O2WA Na1 O3A 70.3(4) 5 7 ? 
O2WA Na1 O3A 109.7(4) . 7 ? 
C12B Na1 O3A 70.9(4) 5 7 ? 
O2WB Na1 O3A 77.8(6) 2_554 7 ? 
O2WB Na1 O3A 102.2(6) 6_556 7 ? 
O3A Na1 O3A 179.999(1) 3_445 7 ? 
O8A Na1 Na2 69.2(4) . 7 ? 
O8A Na1 Na2 110.8(4) 5 7 ? 
O2WA Na1 Na2 140.6(5) 5 7 ? 
O2WA Na1 Na2 39.4(5) . 7 ? 
C12B Na1 Na2 68.9(5) 5 7 ? 
O2WB Na1 Na2 5.9(7) 2_554 7 ? 
O2WB Na1 Na2 174.1(7) 6_556 7 ? 
O3A Na1 Na2 106.7(4) 3_445 7 ? 
O3A Na1 Na2 73.3(4) 7 7 ? 
O2WB Na2 O2WA 73(3) 8_556 8_556 ? 
O2WB Na2 O2WA 44(2) 8_556 7 ? 
O2WA Na2 O2WA 44.8(8) 8_556 7 ? 
O2WB Na2 O5B 86(3) 8_556 . ? 
O2WA Na2 O5B 159.2(13) 8_556 . ? 
O2WA Na2 O5B 119.1(10) 7 . ? 
O2WB Na2 O8B 113(3) 8_556 8_556 ? 
O2WA Na2 O8B 48.7(6) 8_556 8_556 ? 
O2WA Na2 O8B 93.3(9) 7 8_556 ? 
O5B Na2 O8B 145.5(11) . 8_556 ? 
O2WB Na2 O5A 96(3) 8_556 . ? 
O2WA Na2 O5A 168.6(12) 8_556 . ? 
O2WA Na2 O5A 126.9(10) 7 . ? 
O5B Na2 O5A 9.5(3) . . ? 
O8B Na2 O5A 139.4(9) 8_556 . ? 
O2WB Na2 Na2 91(3) 8_556 2_655 ? 
O2WA Na2 Na2 47.9(8) 8_556 2_655 ? 
O2WA Na2 Na2 46.9(7) 7 2_655 ? 
O5B Na2 Na2 136.2(11) . 2_655 ? 
O8B Na2 Na2 74.2(9) 8_556 2_655 ? 
O5A Na2 Na2 135.5(9) . 2_655 ? 
O2WA O2WA Na2 68.8(9) 2_554 8_455 ? 
O2WA O2WA Na2 66.4(9) 2_554 7 ? 
Na2 O2WA Na2 85.2(13) 8_455 7 ? 
O2WA O2WA Na1 138.2(12) 2_554 . ? 
Na2 O2WA Na1 147.1(9) 8_455 . ? 
Na2 O2WA Na1 90.9(8) 7 . ? 
Na2 O2WB Na1 153(3) 8_455 2_554 ? 
 
_diffrn_measured_fraction_theta_max    0.997 
_diffrn_reflns_theta_full              26.41 
_diffrn_measured_fraction_theta_full   0.997 
_refine_diff_density_max    1.423 
_refine_diff_density_min   -0.958 
_refine_diff_density_rms    0.120 
